# Supplementary material for: Additives Altered Bacterial Communities and Metabolic Profiles in Silage Hybrid Pennisetum
Source: Front Microbiol. 2022 Jan 5;12:770728. doi: 10.3389/fmicb.2021.770728 (PMC8767026; doi:10.3389/fmicb.2021.770728)
Supplement: Supplementary file 9 [file Table_9.XLSX]

## Sheet: CK vs MA
Table S9a Correlation analyses between differential bacteria and metabolites caused by malic acid
Var1	Var2	Cor	P value
Ala-Glu	g_Thermobacillus	0.979254	2.92321e-08
Pro-Glu	f_Bacillaceae	0.978362	3.60295e-08
Ala-Glu	f_Bacillaceae	0.978324	3.63414e-08
L-Saccharopine	f_Bacillaceae	0.978184	3.75241e-08
Ala-Glu	g_Bacillus	0.977901	4.00031e-08
L-Saccharopine	g_Bacillus	0.97789	4.00969e-08
Pro-Glu	g_Bacillus	0.977518	4.35634e-08
Thr-Glu	f_Bacillaceae	0.975686	6.42426e-08
Thr-Glu	g_Thermobacillus	0.975592	6.54839e-08
Thr-Glu	g_Bacillus	0.975561	6.59062e-08
His-Ile	g_Thermobacillus	0.973337	1.0148e-07
L-Saccharopine	g_Thermobacillus	0.972883	1.10337e-07
Ile-Glu	g_Bacillus	0.972023	1.28799e-07
Ile-Val	s_Paenibacillus_barengoltzii	0.970993	1.54036e-07
Ile-Glu	f_Bacillaceae	0.970848	1.57897e-07
Pro-Glu	o_Bacillales	0.970774	1.59896e-07
Pro-Glu	s_Bacillus_coagulans	0.970462	1.6852e-07
Ala-Glu	o_Bacillales	0.969672	1.92031e-07
L-Saccharopine	o_Bacillales	0.968879	2.18187e-07
Ile-Glu	s_Bacillus_coagulans	0.968621	2.27315e-07
L-Saccharopine	s_Bacillus_coagulans	0.968183	2.43414e-07
Dulcitol	g_Flavobacterium	0.966998	2.91676e-07
Thr-Glu	o_Bacillales	0.966855	2.98001e-07
Pro-Glu	g_Thermobacillus	0.966375	3.19927e-07
Ala-Glu	s_Bacillus_coagulans	0.966269	3.24946e-07
Ala-Glu	s_Paenibacillus_barengoltzii	0.966199	3.28316e-07
Ile-Val	f_Bacillaceae	0.965452	3.65748e-07
Ile-Val	g_Bacillus	0.964919	3.94507e-07
Ile-Val	g_Thermobacillus	0.963654	4.69929e-07
Tyr-Val	g_Streptomyces	0.963038	5.10589e-07
Tyr-Val	o_Streptomycetales	0.9628	5.27022e-07
Tyr-Val	f_Streptomycetaceae	0.9628	5.27022e-07
Thr-Glu	s_Paenibacillus_barengoltzii	0.961979	5.87015e-07
Ala-Glu	g_Paenibacillus	0.961327	6.38396e-07
Ile-Ile	o_Bacillales	0.960658	6.94747e-07
Thr-Glu	s_Bacillus_coagulans	0.959306	8.20803e-07
His-Ile	f_Bacillaceae	0.95921	8.30392e-07
Ile-Ile	g_Thermobacillus	0.957977	9.61621e-07
His-Ile	g_Bacillus	0.957787	9.83323e-07
Ile-Ile	f_Bacillaceae	0.956068	1.19697e-06
His-Ile	o_Bacillales	0.956015	1.2041e-06
L-Saccharopine	s_Paenibacillus_barengoltzii	0.955305	1.30297e-06
Ile-Ile	g_Bacillus	0.955023	1.34396e-06
Ile-Glu	s_Paenibacillus_barengoltzii	0.95426	1.45997e-06
Ile-Val	g_Paenibacillus	0.954176	1.47323e-06
Thr-Glu	g_Paenibacillus	0.952376	1.78074e-06
Ile-Glu	g_Paenibacillus	0.951616	1.92491e-06
L-Saccharopine	g_Paenibacillus	0.950525	2.14799e-06
Ile-Val	s_Bacillus_coagulans	0.950194	2.21961e-06
Norharmane	f_p-251-o5	0.949476	2.38128e-06
Norharmane	g_p-251-o5	0.949476	2.38128e-06
His-Ile	s_Paenibacillus_barengoltzii	0.948019	2.73816e-06
Ile-Val	o_Bacillales	0.947097	2.98511e-06
Ile-Glu	g_Thermobacillus	0.946	3.30158e-06
L-Malic_acid	g_Thermobacillus	0.944699	3.71084e-06
Ile-Glu	o_Bacillales	0.944688	3.71448e-06
myo-Inositol	s_Bacillus_coagulans	0.94455	3.7599e-06
Norharmane	g_Christensenellaceae-R-7-group	0.944081	3.91851e-06
Norharmane	f_Christensenellaceae	0.944072	3.92163e-06
Thymine	g_Weissella	0.94323	4.22006e-06
Thymine	f_Leuconostocaceae	0.943154	4.24773e-06
Norharmane	f_Paludibacteraceae	0.943049	4.28619e-06
Ile-Val	s_Thermobacillus_composti	0.941996	4.68914e-06
His-Ile	s_Thermobacillus_composti	0.941764	4.78173e-06
Ala-Glu	s_Thermobacillus_composti	0.941582	4.85531e-06
Norharmane	c_Clostridia	0.941214	5.00722e-06
Norharmane	o_Clostridiales	0.941181	5.02106e-06
Val-Ile	g_Bacillus	0.941148	5.03472e-06
Ile-Val	s_Bacillus_smithii	0.940272	5.41266e-06
Ile-Ile	s_Bacillus_coagulans	0.94014	5.47141e-06
Val-Ile	f_Bacillaceae	0.940136	5.47309e-06
His-Ile	s_Bacillus_coagulans	0.939592	5.72144e-06
Thr-Leu	s_Bacillus_coagulans	0.939176	5.91694e-06
Norharmane	g_Caproiciproducens	0.938982	6.00948e-06
Thr-Glu	s_Thermobacillus_composti	0.937384	6.82008e-06
Thr-Asp	g_Thermobacillus	0.936725	7.17874e-06
Pro-Glu	s_Thermobacillus_composti	0.935121	8.11385e-06
His-Ile	g_Paenibacillus	0.934848	8.2818e-06
His-Ile	g_Streptomyces	0.934672	8.39191e-06
His-Ile	o_Streptomycetales	0.934663	8.39784e-06
His-Ile	f_Streptomycetaceae	0.934663	8.39784e-06
L-Malic_acid	f_Bacillaceae	0.933947	8.85687e-06
L-Malic_acid	g_Bacillus	0.93388	8.90087e-06
Pro-Glu	g_Paenibacillus	0.933177	9.37286e-06
Pro-Glu	s_Paenibacillus_barengoltzii	0.932969	9.51676e-06
myo-Inositol	g_Bacillus	0.932716	9.69344e-06
L-Malic_acid	s_Paenibacillus_barengoltzii	0.931512	1.05701e-05
myo-Inositol	f_Bacillaceae	0.93117	1.08309e-05
L-Saccharopine	s_Thermobacillus_composti	0.928757	1.28136e-05
Ile-Val	o_Streptomycetales	0.928593	1.29582e-05
Ile-Val	f_Streptomycetaceae	0.928593	1.29582e-05
Ile-Val	g_Streptomyces	0.928542	1.30035e-05
Thr-Asp	s_Paenibacillus_barengoltzii	0.928496	1.30446e-05
L-Malic_acid	o_Bacillales	0.928212	1.32995e-05
Norharmane	f_Alicyclobacillaceae	0.927971	1.35181e-05
Thr-Asp	g_Bacillus	0.927435	1.40161e-05
Tyr-Val	s_Paenibacillus_barengoltzii	0.927199	1.42393e-05
L-Malic_acid	g_Paenibacillus	0.927126	1.43091e-05
Thr-Asp	f_Bacillaceae	0.927022	1.44092e-05
Val-Ile	o_Bacillales	0.925837	1.55857e-05
Ile-Ile	s_Thermobacillus_composti	0.925597	1.58336e-05
His-Ile	s_Bacillus_smithii	0.925572	1.58594e-05
Val-Ile	s_Bacillus_coagulans	0.925012	1.64487e-05
Thr-Leu	g_Bacillus	0.924723	1.67605e-05
L-Malic_acid	s_Bacillus_coagulans	0.92466	1.68285e-05
Val-Ile	g_Thermobacillus	0.923741	1.78526e-05
Thr-Leu	f_Bacillaceae	0.923692	1.79081e-05
Thr-Glu	s_Bacillus_smithii	0.922889	1.88443e-05
Norharmane	g_Prevotellaceae-UCG-004	0.922705	1.90648e-05
Ala-Glu	f_Paenibacillaceae	0.922352	1.94923e-05
Tyr-Val	g_Bacillus	0.922265	1.9598e-05
Thr-Leu	g_Prevotellaceae-UCG-001	0.921851	2.01112e-05
Norharmane	g_Muribaculaceae	0.921687	2.03176e-05
Ala-Glu	g_Streptomyces	0.921561	2.04769e-05
Tyr-Val	f_Bacillaceae	0.921517	2.05334e-05
Ala-Glu	o_Streptomycetales	0.921406	2.06748e-05
Ala-Glu	f_Streptomycetaceae	0.921406	2.06748e-05
Thr-Asp	g_Streptomyces	0.921268	2.0852e-05
Thr-Asp	o_Streptomycetales	0.921179	2.09673e-05
Thr-Asp	f_Streptomycetaceae	0.921179	2.09673e-05
Pro-Glu	f_Paenibacillaceae	0.920001	2.25351e-05
Thr-Asp	s_Bacillus_smithii	0.919292	2.35235e-05
Ile-Ile	g_Paenibacillus	0.918312	2.49441e-05
Norharmane	f_Ruminococcaceae	0.917004	2.69454e-05
Norharmane	f_Muribaculaceae	0.916335	2.80175e-05
Tyr-Val	s_Bacillus_ginsengihumi	0.916263	2.81339e-05
Thr-Asp	o_Bacillales	0.915841	2.883e-05
Ala-Glu	c_Bacilli	0.915705	2.90567e-05
L-Saccharopine	c_Bacilli	0.914958	3.03284e-05
L-Saccharopine	f_Paenibacillaceae	0.914807	3.05901e-05
Tyr-Val	g_Thermobacillus	0.914302	3.14806e-05
Ile-Ile	s_Paenibacillus_barengoltzii	0.913852	3.22909e-05
Norethindrone_Acetate	s_Bacillus_ginsengihumi	0.913425	3.30742e-05
Ile-Glu	s_Thermobacillus_composti	0.913321	3.3268e-05
His-Ile	f_Paenibacillaceae	0.913161	3.35669e-05
L-Glutamate	p_Proteobacteria	0.912901	3.40566e-05
L-Saccharopine	g_Streptomyces	0.912313	3.51863e-05
L-Saccharopine	o_Streptomycetales	0.91217	3.54658e-05
L-Saccharopine	f_Streptomycetaceae	0.91217	3.54658e-05
Thr-Glu	g_Streptomyces	0.911608	3.65788e-05
N-Acetyl-DL-methionine	g_Flavobacterium	0.911544	3.67075e-05
Thr-Glu	o_Streptomycetales	0.911501	3.67936e-05
Thr-Glu	f_Streptomycetaceae	0.911501	3.67936e-05
Norharmane	g_Bacteroides	0.911312	3.71764e-05
Norharmane	f_Bacteroidaceae	0.911312	3.71764e-05
Norharmane	g_hoa5-07d05-gut-group	0.910856	3.81128e-05
Val-Ile	s_Paenibacillus_barengoltzii	0.910494	3.88694e-05
Ile-Val	f_Paenibacillaceae	0.908553	4.31259e-05
Thr-Glu	f_Paenibacillaceae	0.90821	4.3913e-05
Thr-Asp	g_Paenibacillus	0.908149	4.40556e-05
Ile-Ile	f_Paenibacillaceae	0.907612	4.53172e-05
Ala-Glu	s_Bacillus_smithii	0.907554	4.54549e-05
Val-Ile	g_Paenibacillus	0.907357	4.59249e-05
Ala-Glu	p_Firmicutes	0.905356	5.09264e-05
His-Ile	c_Bacilli	0.904871	5.22011e-05
Tyr-Val	s_Bacillus_coagulans	0.903739	5.52728e-05
myo-Inositol	p_Firmicutes	0.903309	5.64781e-05
Thr-Asp	s_Bacillus_clausii	0.903117	5.7021e-05
Ile-Val	c_Bacilli	0.9031	5.70712e-05
L-Saccharopine	p_Firmicutes	0.903015	5.73127e-05
myo-Inositol	g_Paenibacillus	0.902234	5.95774e-05
Thr-Val	s_Bacillus_coagulans	0.901893	6.05877e-05
Thr-Val	g_Bacillus	0.901264	6.2486e-05
Thr-Val	f_Bacillaceae	0.901059	6.31162e-05
Thr-Asp	s_Bacillus_coagulans	0.900722	6.41619e-05
D-Threitol	g_Flavobacterium	0.900112	6.6087e-05
Thr-Val	g_Streptomyces	0.899532	6.79579e-05
Thr-Val	o_Streptomycetales	0.899518	6.80028e-05
Thr-Val	f_Streptomycetaceae	0.899518	6.80028e-05
Tyramine	o_Bacillales	0.898461	7.15278e-05
myo-Inositol	o_Bacillales	0.898143	7.26139e-05
myo-Inositol	c_Bacilli	0.895995	8.02993e-05
L-Malic_acid	p_Firmicutes	0.894975	8.41674e-05
L-Malic_acid	g_Streptomyces	0.894492	8.60489e-05
Thr-Val	s_Bacillus_ginsengihumi	0.894445	8.62305e-05
L-Malic_acid	o_Streptomycetales	0.894335	8.66669e-05
L-Malic_acid	f_Streptomycetaceae	0.894335	8.66669e-05
Tyramine	g_Thermobacillus	0.893601	8.96043e-05
Thr-Asp	s_Thermobacillus_composti	0.89271	9.32723e-05
L-Malic_acid	s_Thermobacillus_composti	0.891093	0.000100235
Ile-Ile	s_Bacillus_smithii	0.890894	0.000101119
myo-Inositol	s_Paenibacillus_barengoltzii	0.890844	0.000101342
Thr-Leu	g_Paenibacillus	0.890358	0.000103532
Thr-Glu	c_Bacilli	0.890273	0.000103917
Thr-Leu	s_Paenibacillus_barengoltzii	0.890043	0.000104971
Tyr-Val	g_Paenibacillus	0.889462	0.000107666
Tyr-Val	s_Bacillus_smithii	0.889295	0.000108446
Thr-Leu	o_Bacillales	0.888882	0.000110408
Ile-Val	p_Firmicutes	0.887954	0.000114907
Pro-Glu	c_Bacilli	0.887906	0.000115146
Dulcitol	f_Leuconostocaceae	0.887813	0.000115608
Thr-Glu	s_Bacillus_ginsengihumi	0.887803	0.000115656
Val-Ile	s_Thermobacillus_composti	0.887544	0.000116943
L-Malic_acid	c_Bacilli	0.887385	0.000117742
L-Saccharopine	s_Bacillus_smithii	0.886912	0.000120136
Thymine	s_Weissella_paramesenteroides	0.886342	0.000123069
Tyr-Val	o_Bacillales	0.885797	0.00012593
Val-Ile	s_Bacillus_smithii	0.885743	0.000126214
Leu-Ser	g_Bacillus	0.885642	0.000126754
Leu-Ser	f_Bacillaceae	0.884947	0.000130491
Ile-Glu	f_Paenibacillaceae	0.884894	0.00013078
Tyramine	p_Firmicutes	0.884316	0.000133963
His-Ile	p_Firmicutes	0.883956	0.000135978
Tyramine	f_Paenibacillaceae	0.883743	0.000137176
L-Saccharopine	s_Bacillus_ginsengihumi	0.883457	0.000138803
His-Ile	s_Geobacillus_thermodenitrificans	0.883331	0.000139523
Dulcitol	g_Weissella	0.883004	0.000141413
Thr-Glu	s_Bacillus_clausii	0.882788	0.000142665
Thr-Leu	g_Tuberibacillus	0.882455	0.000144624
Malonic_acid	g_Flavobacterium	0.881961	0.000147557
Thr-Leu	p_Firmicutes	0.880652	0.000155572
L-Glutamate	o_Betaproteobacteriales	0.880525	0.000156365
L-Glutamate	f_Burkholderiaceae	0.880181	0.00015853
Pro-Glu	s_Bacillus_smithii	0.880116	0.000158947
Tyramine	s_Bacillus_coagulans	0.880073	0.00015922
Tyramine	f_Bacillaceae	0.880059	0.000159309
Leu-Ser	s_Bacillus_coagulans	0.87983	0.000160768
L-Malic_acid	f_Paenibacillaceae	0.87915	0.000165171
Tyramine	g_Bacillus	0.878515	0.000169372
Thr-Val	s_Paenibacillus_barengoltzii	0.876904	0.000180395
Pro-Glu	g_Streptomyces	0.876755	0.000181441
Pro-Glu	o_Streptomycetales	0.876625	0.000182356
Pro-Glu	f_Streptomycetaceae	0.876625	0.000182356
myo-Inositol	g_Thermobacillus	0.876553	0.000182867
Tyramine	g_Paenibacillus	0.875557	0.000190037
Thr-Leu	g_Thermobacillus	0.875553	0.000190064
L-Glutamate	c_Gammaproteobacteria	0.875448	0.000190835
His-Ile	g_Geobacillus	0.875215	0.000192542
5-Methylcytosine	s_Weissella_paramesenteroides	0.875047	0.000193788
Thr-Asp	s_Bacillus_ginsengihumi	0.87403	0.000201441
Pro-Glu	s_Bacillus_ginsengihumi	0.87396	0.000201982
Ile-Glu	s_Bacillus_smithii	0.87275	0.000211418
Ile-Glu	c_Bacilli	0.87161	0.000220618
Thr-Val	p_Firmicutes	0.871202	0.000223986
Thr-Leu	c_Bacilli	0.870625	0.000228813
Val-Ile	s_Bacillus_clausii	0.870378	0.000230904
Norharmane	p_Actinobacteria	0.869931	0.000234734
D-Threitol	f_Leuconostocaceae	0.869488	0.000238568
Thr-Val	g_Thermobacillus	0.869316	0.000240073
Leu-Ser	o_Bacillales	0.869214	0.000240971
L-Alanine	g_Flavobacterium	0.868804	0.000244594
L-Glutamate	g_Aquabacterium	0.867619	0.000255309
Thymine	g_Flavobacterium	0.867223	0.000258974
Ile-Val	s_Bacillus_ginsengihumi	0.866877	0.000262204
Tyr-Val	s_Thermobacillus_composti	0.866852	0.000262443
D-Threitol	g_Weissella	0.866649	0.000264353
Norharmane	c_Actinobacteria	0.866268	0.000267976
Ile-Phe	s_Bacillus_clausii	0.86615	0.000269103
Ile-Ile	g_Streptomyces	0.865838	0.000272098
Ile-Ile	o_Streptomycetales	0.865713	0.000273313
Ile-Ile	f_Streptomycetaceae	0.865713	0.000273313
Pro-Glu	p_Firmicutes	0.865691	0.000273526
L-Alanine	f_Leuconostocaceae	0.865641	0.000274013
Ile-Glu	s_Bacillus_ginsengihumi	0.864531	0.000284959
N-Acetyl-DL-methionine	f_Leuconostocaceae	0.86444	0.00028588
Ala-Glu	s_Bacillus_ginsengihumi	0.864315	0.000287136
Thr-Val	g_Prevotellaceae-UCG-001	0.8639	0.000291333
Galactonic_acid	o_Streptomycetales	0.863463	0.00029582
Galactonic_acid	f_Streptomycetaceae	0.863463	0.00029582
Galactonic_acid	g_Streptomyces	0.863431	0.000296143
Thr-Glu	p_Firmicutes	0.862821	0.0003025
Tyramine	c_Bacilli	0.862618	0.000304628
Val-Ile	s_Bacillus_ginsengihumi	0.862466	0.000306236
Ile-Glu	p_Firmicutes	0.861869	0.00031262
L-Alanine	g_Weissella	0.861855	0.000312762
His-Ile	s_Bacillus_ginsengihumi	0.861154	0.000320388
Norethindrone_Acetate	g_Prevotellaceae-UCG-001	0.861097	0.000321019
His-Ile	s_Bacillus_clausii	0.860309	0.000329762
His-Ile	f_Thermoactinomycetaceae	0.860164	0.000331395
N-Acetyl-DL-methionine	g_Weissella	0.859501	0.000338933
Ile-Ile	c_Bacilli	0.858986	0.000344876
Thr-Val	o_Bacillales	0.858507	0.00035048
Dulcitol	f_Flavobacteriaceae	0.858399	0.000351748
Harmane	p_Proteobacteria	0.858251	0.000353506
myo-Inositol	g_Prevotellaceae-UCG-001	0.858073	0.000355614
L-Alanine	p_Proteobacteria	0.857115	0.000367158
Tyramine	s_Thermobacillus_composti	0.856811	0.000370888
Ile-Val	g_Prevotellaceae-UCG-001	0.85666	0.00037274
Isocitrate	o_Acidobacteriales	0.856419	0.000375722
Ile-Phe	g_Thermobacillus	0.856005	0.000380892
5-Methylcytosine	g_Weissella	0.855907	0.000382133
Ile-Val	s_Bacillus_clausii	0.855833	0.000383064
Ile-Ile	s_Bacillus_clausii	0.855439	0.000388057
Ile-Glu	g_Streptomyces	0.855269	0.000390231
Ile-Glu	o_Streptomycetales	0.854878	0.000395253
Ile-Glu	f_Streptomycetaceae	0.854878	0.000395253
5-Methylcytosine	f_Leuconostocaceae	0.854592	0.000398965
Thr-Phe	s_Bacillus_ginsengihumi	0.854429	0.000401088
Acetylcholine	p_Proteobacteria	0.853349	0.000415399
Norethindrone_Acetate	s_Bacillus_coagulans	0.853032	0.000419673
His-Ile	g_Thermoactinomyces	0.852696	0.000424237
Leu-Ser	s_Bacillus_ginsengihumi	0.851934	0.000434737
Ile-Val	f_Thermoactinomycetaceae	0.851928	0.000434823
Thr-Leu	f_Sporolactobacillaceae	0.851763	0.000437119
Thr-Val	c_Bacilli	0.851395	0.00044229
Tyramine	s_Paenibacillus_barengoltzii	0.850869	0.000449758
Pro-Glu	f_Thermoactinomycetaceae	0.850265	0.000458441
Harmane	g_Flavobacterium	0.850033	0.000461814
Ala-Glu	s_Bacillus_clausii	0.849916	0.000463522
Thr-Val	g_Paenibacillus	0.849329	0.000472173
L-Threonine	g_Flavobacterium	0.849047	0.000476379
Ile-Ile	f_Thermoactinomycetaceae	0.848744	0.000480908
Pro-Glu	g_Geobacillus	0.848636	0.000482544
Ile-Val	g_Lihuaxuella	0.84835	0.000486874
Pro-Glu	s_Geobacillus_thermodenitrificans	0.848025	0.000491824
Val-Ile	f_Paenibacillaceae	0.847836	0.000494737
Ile-Ile	g_Geobacillus	0.847146	0.000505428
Thr-Leu	s_Thermobacillus_composti	0.846963	0.000508299
Thr-Asp	c_Sericytochromatia	0.845372	0.000533776
Thr-Asp	f_Sericytochromatia	0.845372	0.000533776
Thr-Asp	o_Sericytochromatia	0.845372	0.000533776
Thr-Asp	g_Sericytochromatia	0.845372	0.000533776
Ile-Val	g_Thermoactinomyces	0.84534	0.000534297
Diacetyl	g_Flavobacterium	0.844933	0.000540972
L-Alanine	s_Weissella_paramesenteroides	0.844791	0.000543314
Thr-Val	c_Actinobacteria	0.84467	0.000545323
Ile-Phe	g_Paenibacillus	0.844298	0.000551518
N-Acetyl-DL-methionine	s_Weissella_paramesenteroides	0.844197	0.000553211
D-Threitol	p_Proteobacteria	0.843608	0.000563151
Thr-Leu	f_Paenibacillaceae	0.843507	0.000564885
Ala-Glu	s_Geobacillus_thermodenitrificans	0.843345	0.000567641
Thr-Phe	o_Streptomycetales	0.843137	0.00057121
Thr-Phe	f_Streptomycetaceae	0.843137	0.00057121
Thr-Phe	g_Streptomyces	0.84288	0.000575638
L-Saccharopine	s_Geobacillus_thermodenitrificans	0.842758	0.000577755
Thr-Asp	f_Paenibacillaceae	0.842309	0.000585591
Pro-Glu	g_Ureibacillus	0.841518	0.000599587
myo-Inositol	s_Bacillus_ginsengihumi	0.841055	0.000607895
Ile-Ile	s_Geobacillus_thermodenitrificans	0.840937	0.000610026
Tyr-Val	c_Bacilli	0.840852	0.000611565
Thr-Val	p_Actinobacteria	0.840344	0.000620821
Ile-Ile	g_Thermoactinomyces	0.839958	0.000627949
Pro-Glu	g_Thermoactinomyces	0.839841	0.000630113
L-Aspartate	p_Proteobacteria	0.839524	0.000636014
L-Threonine	f_Leuconostocaceae	0.839449	0.00063741
Ile-Ile	s_Bacillus_ginsengihumi	0.838841	0.00064888
Ile-Phe	s_Paenibacillus_barengoltzii	0.838459	0.000656149
Val-Ile	g_Streptomyces	0.838439	0.000656537
Val-Ile	o_Streptomycetales	0.838216	0.000660831
Val-Ile	f_Streptomycetaceae	0.838216	0.000660831
L-Malic_acid	s_Bacillus_smithii	0.837949	0.000665984
myo-Inositol	f_Paenibacillaceae	0.837299	0.000678662
Diacetyl	p_Proteobacteria	0.837234	0.000679941
Norethindrone_Acetate	g_Bacillus	0.836883	0.000686869
D-Threitol	s_Weissella_paramesenteroides	0.836794	0.00068864
Acetylcholine	g_Flavobacterium	0.836486	0.000694778
Phytosphingosine	p_Proteobacteria	0.836104	0.000702447
Phytosphingosine	c_Thermoleophilia	0.835825	0.000708107
Leu-Ser	g_Thermobacillus	0.83577	0.000709223
Thr-Leu	s_Bacillus_ginsengihumi	0.835718	0.000710275
L-Threonine	g_Weissella	0.83451	0.00073519
L-Saccharopine	g_Geobacillus	0.834494	0.000735538
Ala-Glu	g_Geobacillus	0.83408	0.000744242
Norethindrone_Acetate	f_Bacillaceae	0.834027	0.000745345
Ile-Phe	o_Bacillales	0.833947	0.000747039
Dulcitol	g_Leuconostoc	0.833368	0.000759378
myo-Inositol	s_Thermobacillus_composti	0.833037	0.000766487
Thr-Leu	g_Ureibacillus	0.832713	0.000773516
Pro-Glu	g_Prevotellaceae-UCG-001	0.831876	0.000791882
L-Saccharopine	s_Bacillus_clausii	0.831752	0.000794641
Thr-Glu	f_Thermoactinomycetaceae	0.831442	0.000801546
Pro-Glu	f_Sporolactobacillaceae	0.831168	0.000807671
Ile-Val	s_Geobacillus_thermodenitrificans	0.830838	0.000815132
Tyr-Val	p_Firmicutes	0.830614	0.000820207
Dulcitol	s_Weissella_paramesenteroides	0.830183	0.000830065
Ile-Phe	g_Clostridium-sensu-stricto-8	0.829482	0.000846269
Galactonic_acid	s_Wallaby_gut	0.829343	0.000849532
Phe-Pro	c_Sericytochromatia	0.828375	0.000872383
Phe-Pro	f_Sericytochromatia	0.828375	0.000872383
Phe-Pro	o_Sericytochromatia	0.828375	0.000872383
Phe-Pro	g_Sericytochromatia	0.828375	0.000872383
Ile-Glu	g_Lihuaxuella	0.82608	0.000928476
L-Aspartate	f_Leuconostocaceae	0.826069	0.000928759
Thr-Leu	g_Lihuaxuella	0.826008	0.000930282
Thr-Glu	s_Geobacillus_thermodenitrificans	0.82588	0.000933494
Phytosphingosine	o_Solirubrobacterales	0.825751	0.00093675
L-Saccharopine	f_Sporolactobacillaceae	0.824698	0.000963583
L-Aspartate	g_Weissella	0.823903	0.000984248
L-Malic_acid	s_Bacillus_ginsengihumi	0.823544	0.000993663
Thr-Val	f_Family-XVIII	0.823159	0.00100386
Malonic_acid	s_Weissella_paramesenteroides	0.822848	0.00101216
Ile-Glu	g_Prevotellaceae-UCG-001	0.822558	0.00101995
Thr-Val	s_Thermobacillus_composti	0.822189	0.00102991
Thr-Glu	g_Thermoactinomyces	0.821902	0.00103774
D-Lyxose	f_Leuconostocaceae	0.82105	0.00106117
Ile-Phe	g_Bacillus	0.821011	0.00106225
Ala-Glu	f_Thermoactinomycetaceae	0.820698	0.00107097
Thr-Glu	g_Geobacillus	0.820417	0.00107886
Norharmane	g_Gluconobacter	0.820328	0.00108136
Ile-Val	g_Ureibacillus	0.820099	0.00108782
D-Lyxose	g_Weissella	0.819882	0.00109397
Ile-Phe	f_Bacillaceae	0.819727	0.00109837
Ile-Ile	p_Firmicutes	0.819199	0.0011135
Galactonic_acid	c_Sericytochromatia	0.818726	0.0011272
Galactonic_acid	f_Sericytochromatia	0.818726	0.0011272
Galactonic_acid	o_Sericytochromatia	0.818726	0.0011272
Galactonic_acid	g_Sericytochromatia	0.818726	0.0011272
Thr-Val	f_Sporolactobacillaceae	0.818411	0.00113639
Diacetyl	f_Leuconostocaceae	0.818013	0.00114806
L-Saccharopine	g_Prevotellaceae-UCG-001	0.81783	0.00115347
Ile-Val	f_Micromonosporaceae	0.81772	0.00115675
Ile-Val	o_Micromonosporales	0.81772	0.00115675
Pro-Glu	g_Lihuaxuella	0.817254	0.00117062
Ile-Val	g_Geobacillus	0.816922	0.0011806
Norharmane	f_Family-XVIII	0.816722	0.00118664
Thr-Glu	g_Ureibacillus	0.816185	0.00120295
Ile-Glu	s_Bacillus_clausii	0.81577	0.00121569
Diacetyl	g_Weissella	0.815433	0.00122612
Norethindrone_Acetate	g_Tuberibacillus	0.815318	0.0012297
Ala-Glu	g_Lihuaxuella	0.814896	0.00124286
Ala-Glu	g_Prevotellaceae-UCG-001	0.814894	0.00124294
N-Acetyl-DL-methionine	g_Leuconostoc	0.814869	0.00124371
Thr-Val	g_Tuberibacillus	0.814867	0.00124376
Uracil	g_Tuberibacillus	0.814823	0.00124515
5-Methylcytosine	p_Proteobacteria	0.814575	0.00125296
Norharmane	f_Heliobacteriaceae	0.81378	0.00127824
Pro-Glu	s_Bacillus_clausii	0.81264	0.00131513
Pro-Glu	g_Brevibacillus	0.81245	0.00132136
Ile-Ile	g_Ureibacillus	0.812054	0.00133444
L-Saccharopine	f_Thermoactinomycetaceae	0.811638	0.00134827
Ile-Glu	g_Ureibacillus	0.811483	0.00135345
Tyr-Val	f_Paenibacillaceae	0.81147	0.00135388
Dulcitol	o_Lactobacillales	0.811123	0.00136552
Tyr-Val	s_Bacillus_clausii	0.810899	0.0013731
Thr-Glu	g_Lihuaxuella	0.810187	0.00139737
Ala-Glu	g_Thermoactinomyces	0.809913	0.00140678
Tyramine	g_Brevibacillus	0.809821	0.00140994
Ala-Lys	o_Streptomycetales	0.809615	0.00141707
Ala-Lys	f_Streptomycetaceae	0.809615	0.00141707
L-Alanine	c_Gammaproteobacteria	0.809517	0.00142047
Ala-Lys	g_Streptomyces	0.809312	0.00142763
Harmane	s_Weissella_paramesenteroides	0.809238	0.00143021
L-Alanine	f_Burkholderiaceae	0.808202	0.00146673
L-Alanine	o_Betaproteobacteriales	0.808111	0.00146995
Ala-Glu	f_Sporolactobacillaceae	0.807656	0.00148626
His-Ile	s_Thermoactinomyces_daqus	0.807577	0.0014891
L-Saccharopine	g_Ureibacillus	0.806943	0.00151208
Ala-Lys	g_Paenibacillus	0.806591	0.00152496
Thr-Asp	c_Bacilli	0.806467	0.0015295
Ile-Phe	s_Thermobacillus_composti	0.806376	0.00153285
Ile-Ile	g_Brevibacillus	0.805873	0.00155145
His-Ile	g_Prevotellaceae-UCG-001	0.805017	0.00158354
His-Ile	g_Lihuaxuella	0.804979	0.00158494
3-(3-Hydroxyphenyl)propanoic_acid	o_Lactobacillales	0.804501	0.00160311
Ala-Glu	g_Ureibacillus	0.804244	0.00161293
L-Alanine	g_Aquabacterium	0.804229	0.0016135
Malonic_acid	f_Leuconostocaceae	0.803472	0.00164269
Leu-Ser	g_Paenibacillus	0.803103	0.00165709
Uracil	g_Coprococcus_3	0.802935	0.00166363
Ala-Lys	s_Paenibacillus_barengoltzii	0.802863	0.00166648
Phe-Pro	g_Geobacillus	0.802596	0.00167698
L-Aspartate	o_Betaproteobacteriales	0.802162	0.00169418
L-Aspartate	f_Burkholderiaceae	0.801976	0.0017016
His-Ile	g_Ureibacillus	0.801941	0.00170297
myo-Inositol	f_Sporolactobacillaceae	0.80178	0.00170942
D-Lyxose	g_Flavobacterium	0.801768	0.00170989
L-Aspartate	c_Gammaproteobacteria	0.801319	0.00172797
Phytosphingosine	g_Ideonella	0.801228	0.00173163
Acetylcholine	o_Betaproteobacteriales	0.801136	0.00173534
Acetylcholine	f_Burkholderiaceae	0.800453	0.00176319
Norethindrone_Acetate	f_Sporolactobacillaceae	0.800387	0.00176589
L-Saccharopine	g_Lihuaxuella	0.800052	0.0017797
L-Saccharopine	g_Thermoactinomyces	0.799721	0.0017934
Phytosphingosine	f_Stappiaceae	0.799658	0.00179601
Harmane	g_Pajaroellobacter	0.799604	0.00179829
Thr-Val	f_Paenibacillaceae	0.799557	0.00180022
Ile-Phe	s_Bacillus_coagulans	0.799471	0.00180381
Ile-Val	f_Sporolactobacillaceae	0.799403	0.00180666
Malonic_acid	g_Weissella	0.799045	0.00182164
L-Malic_acid	s_Geobacillus_thermodenitrificans	0.799006	0.00182331
Ile-Val	c_Actinobacteria	0.798445	0.00184699
L-Malic_acid	s_Bacillus_clausii	0.798278	0.0018541
Malonic_acid	g_Pajaroellobacter	0.798153	0.00185945
Diacetyl	s_Weissella_paramesenteroides	0.798001	0.00186596
Ile-Phe	s_Bacillus_shackletonii	0.797794	0.00187483
L-Malic_acid	s_Treponema_porcinum	0.797642	0.00188137
Pro-Glu	s_Thermoactinomyces_daqus	0.797079	0.00190574
L-Alanine	g_Leuconostoc	0.796807	0.00191762
myo-Inositol	g_Tuberibacillus	0.796318	0.00193908
Thymine	o_Lactobacillales	0.796273	0.00194109
Thymine	g_Leuconostoc	0.795798	0.00196214
Dulcitol	s_Zoogloea_resiniphila	0.795588	0.00197148
L-Aspartate	g_Aquabacterium	0.795324	0.00198333
Val-Ile	c_Bacilli	0.794867	0.00200391
Tyramine	f_Sporolactobacillaceae	0.794755	0.00200896
Malonic_acid	p_Proteobacteria	0.794738	0.00200972
His-Ile	c_Sericytochromatia	0.794496	0.00202074
His-Ile	f_Sericytochromatia	0.794496	0.00202074
His-Ile	o_Sericytochromatia	0.794496	0.00202074
His-Ile	g_Sericytochromatia	0.794496	0.00202074
Thr-Glu	g_Prevotellaceae-UCG-001	0.79437	0.00202647
Ile-Pro	c_Sericytochromatia	0.794319	0.0020288
Ile-Pro	f_Sericytochromatia	0.794319	0.0020288
Ile-Pro	o_Sericytochromatia	0.794319	0.0020288
Ile-Pro	g_Sericytochromatia	0.794319	0.0020288
Leu-Ser	s_Paenibacillus_barengoltzii	0.794276	0.00203077
L-Threonine	g_Leuconostoc	0.794158	0.00203613
Dulcitol	o_Flavobacteriales	0.793778	0.00205362
Ile-Ile	s_Thermoactinomyces_daqus	0.793645	0.00205974
L-Aspartate	g_Flavobacterium	0.793643	0.00205981
Acetylcholine	c_Gammaproteobacteria	0.793405	0.00207084
His-Ile	f_Sporolactobacillaceae	0.793342	0.00207377
L-Glutamate	s_Weissella_paramesenteroides	0.793175	0.00208153
Tyr-Val	s_Geobacillus_thermodenitrificans	0.793077	0.00208611
Harmane	o_Betaproteobacteriales	0.79287	0.00209577
Ala-Lys	g_Thermobacillus	0.792593	0.00210876
Ala-Glu	g_Brevibacillus	0.792557	0.00211047
Harmane	f_Burkholderiaceae	0.792293	0.00212293
His-Ile	s_Treponema_porcinum	0.792164	0.00212903
N-Acetyl-DL-methionine	o_Lactobacillales	0.792027	0.00213553
Thr-Val	f_Paludibacteraceae	0.791608	0.0021555
Thr-Val	s_Geobacillus_thermodenitrificans	0.790929	0.00218815
Harmane	f_Leuconostocaceae	0.790548	0.0022066
Harmane	g_Weissella	0.790059	0.00223053
Ala-Lys	s_Bacillus_clausii	0.789947	0.00223601
Ile-Val	p_Actinobacteria	0.789878	0.00223941
Malonic_acid	o_Lactobacillales	0.789803	0.0022431
Tyramine	s_Geobacillus_thermodenitrificans	0.78976	0.00224526
Norethindrone_Acetate	g_Clostridium-sensu-stricto-13	0.789251	0.00227047
Harmane	o_Sphingomonadales	0.788999	0.00228302
Harmane	f_Sphingomonadaceae	0.788999	0.00228302
L-Saccharopine	g_Brevibacillus	0.788277	0.00231931
Leu-Ser	s_Thermobacillus_composti	0.788119	0.00232734
Ile-Phe	s_Bacillus_smithii	0.78811	0.00232779
Ala-Lys	c_Sericytochromatia	0.787638	0.00235179
Ala-Lys	f_Sericytochromatia	0.787638	0.00235179
Ala-Lys	o_Sericytochromatia	0.787638	0.00235179
Ala-Lys	g_Sericytochromatia	0.787638	0.00235179
His-Ile	g_Brevibacillus	0.78751	0.00235837
Tyramine	s_Treponema_porcinum	0.787504	0.00235865
L-Malic_acid	g_Geobacillus	0.787426	0.00236266
D-Threitol	c_Gammaproteobacteria	0.787359	0.00236611
L-Gulonic_gamma-lactone	f_Micromonosporaceae	0.787025	0.0023833
L-Gulonic_gamma-lactone	o_Micromonosporales	0.787025	0.0023833
myo-Inositol	g_Ureibacillus	0.786698	0.00240021
Thr-Asp	s_Geobacillus_thermodenitrificans	0.786476	0.0024118
Ile-Phe	s_Ambystoma_mexicanum	0.785688	0.00245308
Ile-Ile	g_Lihuaxuella	0.785671	0.00245401
Tyr-Val	c_Actinobacteria	0.785615	0.00245697
Harmane	c_Gammaproteobacteria	0.785532	0.00246135
Harmane	g_Novosphingobium	0.785281	0.00247465
Thr-Glu	f_Sporolactobacillaceae	0.785018	0.00248866
Ala-Lys	g_Bacillus	0.784953	0.00249212
Thr-Asp	g_Geobacillus	0.784921	0.00249383
5-Methylcytosine	g_Flavobacterium	0.784913	0.00249425
Acetylcholine	g_Aquabacterium	0.784775	0.00250167
Diacetyl	o_Betaproteobacteriales	0.784722	0.00250451
L-Aspartate	s_Weissella_paramesenteroides	0.784715	0.00250489
Ile-Glu	f_Micromonosporaceae	0.784506	0.00251611
Ile-Glu	o_Micromonosporales	0.784506	0.00251611
Harmane	s_Novosphingobium_capsulatum	0.784237	0.00253063
Diacetyl	f_Burkholderiaceae	0.784167	0.00253439
D-Threitol	g_Leuconostoc	0.784157	0.00253494
Ala-Glu	s_Treponema_porcinum	0.784065	0.00253992
Ala-Lys	f_Bacillaceae	0.783646	0.00256273
Phytosphingosine	g_Pannonibacter	0.783422	0.00257497
Tyramine	g_Geobacillus	0.783284	0.00258253
myo-Inositol	g_Lihuaxuella	0.782332	0.00263518
D-Threitol	f_Burkholderiaceae	0.782213	0.0026418
D-Threitol	o_Betaproteobacteriales	0.781977	0.00265505
Ala-Lys	s_Bacillus_smithii	0.781817	0.00266399
Cytosine	g_Weissella	0.781814	0.0026642
Acetylcholine	f_Leuconostocaceae	0.78179	0.00266556
Val-Ile	f_Thermoactinomycetaceae	0.781329	0.00269158
Cytosine	f_Leuconostocaceae	0.781266	0.00269514
Galactonic_acid	g_Geobacillus	0.780989	0.00271089
Galactonic_acid	s_Geobacillus_thermodenitrificans	0.780929	0.0027143
Leu-Ser	f_Paenibacillaceae	0.780821	0.00272047
Val-Ile	g_Ureibacillus	0.780637	0.00273095
D-Threitol	o_Sphingomonadales	0.780538	0.00273665
D-Threitol	f_Sphingomonadaceae	0.780538	0.00273665
Thr-Glu	g_Brevibacillus	0.780213	0.00275537
Ile-Val	g_Tuberibacillus	0.780011	0.00276703
Norharmane	f_Clostridiaceae-1	0.779973	0.00276923
Malonic_acid	o_Sphingomonadales	0.779807	0.00277885
Malonic_acid	f_Sphingomonadaceae	0.779807	0.00277885
Thr-Asp	f_Thermoactinomycetaceae	0.779423	0.00280118
Galactonic_acid	g_Laceyella	0.779367	0.00280445
Diacetyl	c_Gammaproteobacteria	0.779036	0.00282386
Phe-Pro	s_Geobacillus_thermodenitrificans	0.779014	0.00282515
Thymine	g_Pajaroellobacter	0.778968	0.00282787
Ile-Glu	f_Sporolactobacillaceae	0.778797	0.00283792
D-Threitol	s_Novosphingobium_capsulatum	0.778613	0.0028488
Acetylcholine	g_Weissella	0.77842	0.00286024
D-Threitol	g_Aquabacterium	0.778064	0.00288143
D-Threitol	g_Novosphingobium	0.778003	0.00288508
Leu-Ser	g_Streptomyces	0.777852	0.00289409
Leu-Ser	o_Streptomycetales	0.777762	0.0028995
Leu-Ser	f_Streptomycetaceae	0.777762	0.0028995
Ala-Glu	c_Actinobacteria	0.777603	0.00290908
Phytosphingosine	g_Flavobacterium	0.777591	0.00290979
Ala-Lys	o_Bacillales	0.77709	0.00294004
5-Methylcytosine	o_Rhizobiales	0.777007	0.00294504
Malonic_acid	s_Novosphingobium_capsulatum	0.776772	0.00295932
Phytosphingosine	o_Sphingomonadales	0.776756	0.00296029
Phytosphingosine	f_Sphingomonadaceae	0.776756	0.00296029
Malonic_acid	g_Novosphingobium	0.776709	0.00296318
Acetylcholine	s_Weissella_paramesenteroides	0.77669	0.00296435
Tyr-Val	g_Geobacillus	0.776638	0.00296752
5-Methylcytosine	f_Stappiaceae	0.776452	0.00297888
Norethindrone_Acetate	s_Bacillus_lehensis	0.776436	0.00297982
Harmane	g_Aquabacterium	0.776277	0.00298961
Galactonic_acid	s_Bacillus_ginsengihumi	0.776145	0.00299773
Thr-Val	s_Bacillus_smithii	0.776119	0.00299932
Uracil	g_Prevotellaceae-UCG-001	0.776111	0.00299979
Phytosphingosine	g_Inhella	0.775598	0.0030315
D-Threitol	g_Pajaroellobacter	0.775219	0.00305507
L-Malic_acid	f_Sporolactobacillaceae	0.774536	0.00309791
Ile-Ala	o_Bacillales	0.774357	0.0031092
Phytosphingosine	g_Novosphingobium	0.774195	0.00311947
5-Methylcytosine	g_Pajaroellobacter	0.774128	0.00312372
Phytosphingosine	s_Novosphingobium_capsulatum	0.774113	0.00312466
Tyr-Val	p_Actinobacteria	0.773893	0.00313868
L-Malic_acid	c_Actinobacteria	0.773572	0.00315918
Harmane	f_Stappiaceae	0.7735	0.00316379
Ile-Ile	c_Sericytochromatia	0.773387	0.00317102
Ile-Ile	f_Sericytochromatia	0.773387	0.00317102
Ile-Ile	o_Sericytochromatia	0.773387	0.00317102
Ile-Ile	g_Sericytochromatia	0.773387	0.00317102
Norethindrone_Acetate	o_Bacillales	0.772862	0.00320488
Val-Ile	g_Thermoactinomyces	0.772787	0.0032097
His-Ile	s_Wallaby_gut	0.772573	0.00322362
Norethindrone_Acetate	s_Paenibacillus_barengoltzii	0.772537	0.00322595
myo-Inositol	g_Streptomyces	0.772384	0.0032359
Diacetyl	g_Aquabacterium	0.772234	0.00324565
Thr-Asp	g_Thermoactinomyces	0.772135	0.00325217
Thr-Val	g_Geobacillus	0.772122	0.003253
myo-Inositol	o_Streptomycetales	0.772027	0.00325923
myo-Inositol	f_Streptomycetaceae	0.772027	0.00325923
Ile-Ala	g_Geobacillus	0.772006	0.00326063
Phytosphingosine	o_Rhizobiales	0.771582	0.00328848
Uracil	f_Heliobacteriaceae	0.771487	0.00329476
Uracil	f_Family-XVIII	0.771192	0.0033143
Thr-Leu	f_Micromonosporaceae	0.770564	0.00335621
Thr-Leu	o_Micromonosporales	0.770564	0.00335621
Norharmane	g_Clostridium-sensu-stricto-1	0.770457	0.00336334
Harmane	o_Rhizobiales	0.770302	0.00337381
Thr-Asp	p_Firmicutes	0.770059	0.00339013
Ile-Phe	f_Paenibacillaceae	0.769736	0.00341202
Thymine	o_Sphingomonadales	0.769576	0.00342292
Thymine	f_Sphingomonadaceae	0.769576	0.00342292
Phe-Pro	g_Laceyella	0.769229	0.00344659
Thr-Glu	c_Sericytochromatia	0.769175	0.0034503
Thr-Glu	f_Sericytochromatia	0.769175	0.0034503
Thr-Glu	o_Sericytochromatia	0.769175	0.0034503
Thr-Glu	g_Sericytochromatia	0.769175	0.0034503
Ile-Pro	s_Bacillus_clausii	0.768877	0.00347072
Val-Glu	g_Prevotellaceae-UCG-001	0.76864	0.00348703
Ile-Val	g_Brevibacillus	0.768559	0.00349259
Ile-Ile	f_Sporolactobacillaceae	0.768407	0.00350314
Thymine	s_Novosphingobium_capsulatum	0.768319	0.00350924
myo-Inositol	g_Coprococcus_3	0.768042	0.0035285
Thr-Val	s_Bacillus_lehensis	0.767834	0.00354296
Dulcitol	g_Pajaroellobacter	0.767518	0.00356508
Phytosphingosine	o_Betaproteobacteriales	0.767473	0.00356825
Tyramine	s_Bacillus_circulans	0.76723	0.00358536
Thymine	g_Novosphingobium	0.766967	0.00360389
Ala-Glu	p_Actinobacteria	0.766923	0.00360701
Phytosphingosine	f_Burkholderiaceae	0.766535	0.00363459
Ile-Glu	f_Thermoactinomycetaceae	0.766464	0.00363966
Tyramine	f_Paludibacteraceae	0.766309	0.00365069
Isocitrate	g_Zoogloea	0.766243	0.0036554
Cytosine	s_Weissella_paramesenteroides	0.766045	0.00366958
Thr-Leu	s_Brevibacillus_thermoruber	0.765752	0.00369067
L-Malic_acid	g_Prevotellaceae-UCG-001	0.764605	0.00377398
Ile-Phe	s_Thermobacillus_xylanilyticus	0.764241	0.00380071
Ile-Ala	f_Bacillaceae	0.763922	0.00382428
Tyr-Val	g_Prevotellaceae-UCG-001	0.763775	0.00383516
5-Methylcytosine	o_Betaproteobacteriales	0.76355	0.00385188
5-Methylcytosine	f_Burkholderiaceae	0.763087	0.00388644
Val-Ile	g_Lihuaxuella	0.763041	0.00388992
Ile-Ala	g_Bacillus	0.762489	0.00393141
L-Malic_acid	p_Actinobacteria	0.761829	0.00398158
Tyramine	g_Streptomyces	0.761293	0.00402257
Tyramine	o_Streptomycetales	0.761015	0.00404405
Tyramine	f_Streptomycetaceae	0.761015	0.00404405
Thr-Leu	g_Coprococcus_3	0.760855	0.0040564
Ala-Lys	s_Bacillus_coagulans	0.759857	0.00413419
Ile-Glu	c_Actinobacteria	0.759706	0.00414605
Isocitrate	g_Flavobacterium	0.759255	0.00418164
Harmane	g_Pannonibacter	0.759012	0.00420091
L-Saccharopine	s_Treponema_porcinum	0.758976	0.00420377
Cytosine	f_Stappiaceae	0.758924	0.00420789
Thymine	p_Proteobacteria	0.758441	0.00424644
5-Methylcytosine	c_Gammaproteobacteria	0.758375	0.00425178
5-Methylcytosine	g_Pannonibacter	0.758252	0.0042616
Isocitrate	s_Sphingobacterium_faecium	0.757804	0.0042977
Ile-Pro	s_Bacillus_smithii	0.757513	0.00432133
Dulcitol	g_Zoogloea	0.757476	0.00432428
L-Glutamate	f_Leuconostocaceae	0.757388	0.00433145
Ile-Glu	g_Brevibacillus	0.756266	0.00442343
L-Glutamate	f_Stappiaceae	0.756079	0.0044389
Ile-Ile	s_Wallaby_gut	0.755944	0.00445014
L-Malic_acid	f_Paludibacteraceae	0.755554	0.0044826
L-Glutamate	g_Weissella	0.755349	0.00449967
D-Threitol	o_Lactobacillales	0.755301	0.00450368
Malonic_acid	g_Leuconostoc	0.755192	0.00451282
L-Saccharopine	s_Thermoactinomyces_daqus	0.75502	0.00452727
Thr-Glu	f_Micromonosporaceae	0.754978	0.00453085
Thr-Glu	o_Micromonosporales	0.754978	0.00453085
Ile-Glu	g_Tuberibacillus	0.754888	0.00453839
Dulcitol	o_Acidobacteriales	0.754587	0.00456385
Acetylcholine	f_Stappiaceae	0.754479	0.00457294
5-Methylcytosine	g_Aquabacterium	0.754412	0.00457861
Thr-Leu	s_Bacillus_smithii	0.754359	0.00458311
Ile-Glu	g_Thermoactinomyces	0.75432	0.00458644
Val-Ile	f_Micromonosporaceae	0.753777	0.00463274
Val-Ile	o_Micromonosporales	0.753777	0.00463274
Phytosphingosine	c_Gammaproteobacteria	0.753528	0.00465408
Acetylcholine	o_Rhizobiales	0.753209	0.00468151
Thr-Leu	f_Family-XVIII	0.753057	0.00469468
Norethindrone_Acetate	g_Paenibacillus	0.752503	0.00474271
Uracil	f_Paludibacteraceae	0.752458	0.00474662
Ile-Val	s_Wallaby_gut	0.752413	0.00475055
Pro-Glu	s_Wallaby_gut	0.751856	0.0047993
myo-Inositol	s_Bacillus_smithii	0.751778	0.00480621
Ile-Ile	g_Prevotellaceae-UCG-001	0.751407	0.00483895
L-Alanine	o_Lactobacillales	0.75114	0.00486261
Ile-Ala	g_Thermobacillus	0.750345	0.00493354
L-Malic_acid	s_Thermobacillus_xylanilyticus	0.750287	0.00493876
Leu-Ser	g_Geobacillus	0.74974	0.00498806
Pro-Glu	f_Micromonosporaceae	0.749269	0.00503083
Pro-Glu	o_Micromonosporales	0.749269	0.00503083
Thr-Glu	s_Thermoactinomyces_daqus	0.749135	0.00504298
Ile-Ala	c_Sericytochromatia	0.74905	0.00505081
Ile-Ala	f_Sericytochromatia	0.74905	0.00505081
Ile-Ala	o_Sericytochromatia	0.74905	0.00505081
Ile-Ala	g_Sericytochromatia	0.74905	0.00505081
L-Malic_acid	g_Brevibacillus	0.748867	0.00506754
Ile-Glu	p_Actinobacteria	0.74851	0.00510027
myo-Inositol	f_Paludibacteraceae	0.748351	0.00511492
Harmane	g_Ideonella	0.747992	0.00514814
D-Threitol	f_Flavobacteriaceae	0.747991	0.00514823
D-Lyxose	o_Lactobacillales	0.747818	0.00516428
Leu-Ser	s_Bacillus_smithii	0.747694	0.00517575
His-Ile	c_Actinobacteria	0.74735	0.00520784
L-Saccharopine	c_Actinobacteria	0.747206	0.00522136
Phe-Pro	g_Streptomyces	0.74679	0.00526041
Ala-Lys	s_Thermobacillus_xylanilyticus	0.746564	0.00528177
Phe-Pro	o_Streptomycetales	0.746516	0.00528625
Phe-Pro	f_Streptomycetaceae	0.746516	0.00528625
D-Lyxose	s_Weissella_paramesenteroides	0.746509	0.00528691
Ile-Val	s_Treponema_porcinum	0.745996	0.00533554
Tyr-Val	f_Thermoactinomycetaceae	0.745906	0.00534419
Ile-Val	s_Thermoactinomyces_daqus	0.745726	0.00536132
Diacetyl	o_Sphingomonadales	0.745651	0.00536849
Diacetyl	f_Sphingomonadaceae	0.745651	0.00536849
Ile-Ala	g_Laceyella	0.74545	0.00538779
Ile-Ala	s_Geobacillus_thermodenitrificans	0.745184	0.00541335
Phytosphingosine	g_Aquabacterium	0.744798	0.00545056
Val-Ile	p_Firmicutes	0.744798	0.00545057
Thr-Leu	f_Paludibacteraceae	0.744702	0.00545982
L-Threonine	f_Flavobacteriaceae	0.744396	0.00548956
L-Glutamate	o_Caulobacterales	0.744177	0.00551093
Thr-Leu	g_Streptomyces	0.744177	0.00551094
Ala-Glu	s_Thermoactinomyces_daqus	0.744067	0.00552166
Thr-Leu	o_Streptomycetales	0.744001	0.00552808
Thr-Leu	f_Streptomycetaceae	0.744001	0.00552808
Cytosine	g_Flavobacterium	0.743965	0.00553159
L-Alanine	o_Sphingomonadales	0.743786	0.00554918
L-Alanine	f_Sphingomonadaceae	0.743786	0.00554918
Ile-Ala	s_Bacillus_coagulans	0.743778	0.00554996
Thr-Glu	s_Wallaby_gut	0.74351	0.00557623
L-Glutamate	f_Caulobacteraceae	0.743447	0.00558247
Thr-Phe	s_Paenibacillus_barengoltzii	0.742913	0.00563524
Val-Ile	c_Sericytochromatia	0.742802	0.0056463
Val-Ile	f_Sericytochromatia	0.742802	0.0056463
Val-Ile	o_Sericytochromatia	0.742802	0.0056463
Val-Ile	g_Sericytochromatia	0.742802	0.0056463
Norethindrone_Acetate	g_Thermobacillus	0.742788	0.0056476
Tyramine	g_Ureibacillus	0.742513	0.005675
Ile-Val	g_Campylobacter	0.742397	0.00568661
Ile-Val	f_Campylobacteraceae	0.742397	0.00568661
Thr-Leu	g_Brevibacillus	0.742346	0.0056917
N-Acetyl-DL-methionine	f_Flavobacteriaceae	0.742295	0.0056968
3-(3-Hydroxyphenyl)propanoic_acid	o_Sphingomonadales	0.742135	0.0057128
3-(3-Hydroxyphenyl)propanoic_acid	f_Sphingomonadaceae	0.742135	0.0057128
Tyr-Val	c_Sericytochromatia	0.741891	0.00573728
Tyr-Val	f_Sericytochromatia	0.741891	0.00573728
Tyr-Val	o_Sericytochromatia	0.741891	0.00573728
Tyr-Val	g_Sericytochromatia	0.741891	0.00573728
L-Malic_acid	g_Lihuaxuella	0.741867	0.00573969
L-Threonine	s_Weissella_paramesenteroides	0.741853	0.00574111
Diacetyl	g_Novosphingobium	0.741159	0.0058113
L-Glutamate	g_Pannonibacter	0.741045	0.0058229
Phytosphingosine	c_Alphaproteobacteria	0.740947	0.00583287
Ile-Phe	s_Klebsiella_pneumoniae	0.740869	0.00584078
Ala-Lys	s_Thermobacillus_composti	0.740835	0.00584427
L-Glutamate	g_Caulobacter	0.740626	0.0058656
L-Alanine	s_Novosphingobium_capsulatum	0.740621	0.00586612
Diacetyl	s_Novosphingobium_capsulatum	0.740252	0.0059039
L-Alanine	g_Novosphingobium	0.740238	0.00590533
Tyramine	f_Clostridiaceae-1	0.740139	0.00591553
Tyramine	s_Bacillus_smithii	0.740137	0.00591577
Phe-Pro	g_Lysinibacillus	0.74003	0.00592674
Acetylcholine	o_Sphingomonadales	0.739977	0.00593219
Acetylcholine	f_Sphingomonadaceae	0.739977	0.00593219
Norethindrone_Acetate	c_Bacilli	0.739602	0.00597096
Galactonic_acid	s_Laceyella_sacchari	0.73906	0.00602738
3-(3-Hydroxyphenyl)propanoic_acid	s_Novosphingobium_capsulatum	0.738993	0.00603436
Ala-Glu	c_Sericytochromatia	0.738715	0.00606337
Ala-Glu	f_Sericytochromatia	0.738715	0.00606337
Ala-Glu	o_Sericytochromatia	0.738715	0.00606337
Ala-Glu	g_Sericytochromatia	0.738715	0.00606337
Ile-Val	c_Sericytochromatia	0.738709	0.00606404
Ile-Val	f_Sericytochromatia	0.738709	0.00606404
Ile-Val	o_Sericytochromatia	0.738709	0.00606404
Ile-Val	g_Sericytochromatia	0.738709	0.00606404
Tyramine	g_Coprococcus_3	0.738706	0.0060644
Tyramine	g_Lihuaxuella	0.738661	0.00606909
L-Glutamate	o_Rhizobiales	0.738579	0.00607771
Val-Glu	s_Paenibacillus_barengoltzii	0.738379	0.00609876
Tyr-Val	g_Thermoactinomyces	0.7382	0.00611756
Cytosine	o_Rhizobiales	0.738016	0.006137
3-(3-Hydroxyphenyl)propanoic_acid	o_Acidobacteriales	0.737909	0.00614836
3-(3-Hydroxyphenyl)propanoic_acid	g_Novosphingobium	0.737875	0.00615193
His-Ile	p_Actinobacteria	0.737776	0.00616242
Tyramine	s_Klebsiella_pneumoniae	0.737751	0.00616511
Pro-Glu	g_Tuberibacillus	0.737154	0.00622875
Isocitrate	s_Zoogloea_resiniphila	0.73705	0.00623988
Norethindrone_Acetate	p_Firmicutes	0.737017	0.00624337
L-Alanine	g_Pajaroellobacter	0.736975	0.0062479
Ile-Ile	s_Bacillus_circulans	0.736884	0.00625767
Cytosine	g_Pannonibacter	0.736641	0.00628379
L-Saccharopine	p_Actinobacteria	0.73655	0.00629361
Diacetyl	f_Stappiaceae	0.7364	0.00630974
Ile-Ile	s_Treponema_porcinum	0.736165	0.00633515
Diacetyl	g_Leuconostoc	0.736076	0.0063448
Acetylcholine	g_Pannonibacter	0.735881	0.00636604
L-Aspartate	g_Leuconostoc	0.735745	0.00638083
Thr-Val	g_Prevotellaceae-UCG-004	0.735665	0.00638953
Acetylcholine	c_Thermoleophilia	0.735558	0.00640119
L-Glutamate	g_Inhella	0.735168	0.00644393
Acetylcholine	g_Novosphingobium	0.734705	0.0064949
Dulcitol	s_Novosphingobium_capsulatum	0.734353	0.00653376
Thr-Val	g_Seinonella	0.734186	0.0065523
Ile-Ala	s_Wallaby_gut	0.733962	0.00657731
Ile-Glu	s_Geobacillus_thermodenitrificans	0.733871	0.00658744
Acetylcholine	s_Novosphingobium_capsulatum	0.733551	0.00662317
L-Saccharopine	g_Tuberibacillus	0.733448	0.0066347
Dulcitol	o_Sphingomonadales	0.73327	0.00665473
Dulcitol	f_Sphingomonadaceae	0.73327	0.00665473
Dulcitol	g_Novosphingobium	0.733201	0.00666248
Thr-Glu	s_Treponema_porcinum	0.733119	0.00667177
Val-Ile	g_Geobacillus	0.732985	0.00668681
Thr-Asp	s_Wallaby_gut	0.732909	0.00669546
Ala-Glu	f_Micromonosporaceae	0.732265	0.00676847
Ala-Glu	o_Micromonosporales	0.732265	0.00676847
Norethindrone_Acetate	g_Ureibacillus	0.732101	0.00678708
Thr-Leu	c_Actinobacteria	0.731815	0.00681987
Diacetyl	o_Rhizobiales	0.731449	0.00686186
Tyr-Val	f_Sporolactobacillaceae	0.731444	0.00686238
myo-Inositol	f_Family-XVIII	0.731379	0.00686983
Diacetyl	o_Solirubrobacterales	0.731362	0.00687188
Ala-Glu	g_Tuberibacillus	0.731005	0.00691301
L-Malic_acid	g_Coprococcus_3	0.730606	0.00695936
Tyramine	g_Prevotellaceae-UCG-001	0.730525	0.0069688
Thr-Asp	g_Lihuaxuella	0.730424	0.00698047
His-Ile	f_Micromonosporaceae	0.730372	0.00698652
His-Ile	o_Micromonosporales	0.730372	0.00698652
Ile-Phe	c_Sericytochromatia	0.730003	0.00702968
Ile-Phe	f_Sericytochromatia	0.730003	0.00702968
Ile-Phe	o_Sericytochromatia	0.730003	0.00702968
Ile-Phe	g_Sericytochromatia	0.730003	0.00702968
Isocitrate	g_Novosphingobium	0.729901	0.00704161
Norharmane	s_Treponema_porcinum	0.729737	0.00706094
Thr-Asp	g_Ureibacillus	0.729205	0.00712369
Leu-Ser	s_Geobacillus_thermodenitrificans	0.729173	0.00712746
Isocitrate	o_Sphingomonadales	0.728786	0.00717331
Isocitrate	f_Sphingomonadaceae	0.728786	0.00717331
Malonic_acid	o_Betaproteobacteriales	0.728743	0.0071785
Malonic_acid	f_Burkholderiaceae	0.728741	0.00717871
Isocitrate	s_Novosphingobium_capsulatum	0.728019	0.00726498
Phe-Pro	s_Wallaby_gut	0.727971	0.00727075
L-Threonine	o_Lactobacillales	0.727875	0.00728237
Malonic_acid	s_Zoogloea_resiniphila	0.727708	0.00730238
Val-Ile	g_Brevibacillus	0.727189	0.00736519
Malonic_acid	o_Solirubrobacterales	0.726777	0.00741529
Thr-Leu	p_Actinobacteria	0.725992	0.00751147
Val-Ile	s_Geobacillus_thermodenitrificans	0.725975	0.0075135
Phytosphingosine	s_Sphingobacterium_faecium	0.725965	0.00751485
L-Malic_acid	f_Thermoactinomycetaceae	0.725891	0.00752387
Ile-Glu	g_Geobacillus	0.725842	0.00752992
L-Glutamate	g_Ideonella	0.72574	0.00754253
L-Malic_acid	g_Ureibacillus	0.725648	0.00755391
Tyr-Val	g_Lihuaxuella	0.725609	0.00755875
Val-Glu	f_Heliobacteriaceae	0.725149	0.00761575
Ile-Ala	g_Streptomyces	0.724855	0.00765243
Ile-Ala	s_Thermobacillus_composti	0.724843	0.0076539
Ile-Ala	o_Streptomycetales	0.72459	0.00768558
Ile-Ala	f_Streptomycetaceae	0.72459	0.00768558
Ile-Val	s_Brevibacillus_thermoruber	0.724376	0.00771236
Leu-Ser	f_Thermoactinomycetaceae	0.724239	0.00772958
Uracil	g_Muribaculaceae	0.724174	0.00773783
L-Gulonic_gamma-lactone	s_Paenibacillus_barengoltzii	0.724017	0.00775765
Phe-Pro	g_Thermobacillus	0.723934	0.00776808
Acetylcholine	o_Solirubrobacterales	0.723688	0.00779922
myo-Inositol	g_Brevibacillus	0.723664	0.00780223
Thr-Phe	s_Bacillus_clausii	0.723528	0.00781947
Diacetyl	c_Thermoleophilia	0.723337	0.00784372
Thr-Phe	s_Bacillus_smithii	0.722882	0.00790177
Pro-Glu	s_Treponema_porcinum	0.722294	0.00797714
Malonic_acid	g_Aquabacterium	0.722105	0.00800154
Galactonic_acid	s_Bacillus_smithii	0.721437	0.00808819
Pro-Glu	c_Actinobacteria	0.721238	0.00811403
Thymine	s_Alistipes_finegoldii	0.720994	0.00814589
Thr-Phe	g_Polyangium	0.720684	0.00818656
Malonic_acid	c_Gammaproteobacteria	0.720386	0.00822575
Ile-Glu	s_Brevibacillus_thermoruber	0.72033	0.0082332
myo-Inositol	c_Actinobacteria	0.72008	0.00826619
Ala-Lys	g_Polyangium	0.72006	0.00826879
Ile-Ala	f_Thermoactinomycetaceae	0.719635	0.00832518
Acetylcholine	g_Leuconostoc	0.719167	0.00838755
Phe-Pro	s_Laceyella_sacchari	0.719162	0.00838819
L-Glutamate	g_Flavobacterium	0.71908	0.00839916
Phe-Pro	o_Bacillales	0.719042	0.00840433
Acetylcholine	g_Ideonella	0.718913	0.00842154
Harmane	g_Inhella	0.718769	0.00844088
Thr-Leu	f_Thermoactinomycetaceae	0.718502	0.0084769
L-Gulonic_gamma-lactone	s_Thermobacillus_composti	0.718417	0.00848825
L-Aspartate	c_Thermoleophilia	0.718412	0.00848891
Uracil	f_Muribaculaceae	0.71826	0.00850956
Harmane	c_Alphaproteobacteria	0.718239	0.00851231
Uracil	f_Ruminococcaceae	0.718106	0.00853029
L-Gulonic_gamma-lactone	g_Ureibacillus	0.717823	0.00856869
L-Gulonic_gamma-lactone	g_Lihuaxuella	0.717425	0.00862289
Tyramine	f_Thermoactinomycetaceae	0.717304	0.00863947
L-Glutamate	g_Pajaroellobacter	0.717252	0.00864658
Pro-Glu	s_Brevibacillus_thermoruber	0.71695	0.00868798
D-Threitol	s_Zoogloea_resiniphila	0.71665	0.00872926
Ile-Ala	g_Thermoactinomyces	0.716418	0.00876116
Thr-Val	s_Thermoactinomyces_daqus	0.716276	0.00878089
5-Methylcytosine	o_Sphingomonadales	0.716275	0.00878095
5-Methylcytosine	f_Sphingomonadaceae	0.716275	0.00878095
Thr-Asp	s_Treponema_porcinum	0.716179	0.0087942
Dulcitol	p_Proteobacteria	0.716006	0.00881828
Leu-Ser	s_Thermoactinomyces_daqus	0.715917	0.00883061
Leu-Ser	g_Ureibacillus	0.715664	0.00886586
Acetylcholine	g_Pajaroellobacter	0.715513	0.00888686
Thr-Leu	g_Micromonospora	0.715435	0.00889776
L-Saccharopine	c_Sericytochromatia	0.715425	0.00889919
L-Saccharopine	f_Sericytochromatia	0.715425	0.00889919
L-Saccharopine	o_Sericytochromatia	0.715425	0.00889919
L-Saccharopine	g_Sericytochromatia	0.715425	0.00889919
Leu-Ser	s_Bacillus_lehensis	0.715068	0.00894911
Ile-Ala	s_Bacillus_smithii	0.715024	0.00895529
Diacetyl	g_Pannonibacter	0.714458	0.00903508
Tyramine	c_Actinobacteria	0.71442	0.00904041
Val-Ile	g_Prevotellaceae-UCG-001	0.71424	0.00906595
D-Lyxose	g_Leuconostoc	0.71415	0.00907874
L-Gulonic_gamma-lactone	s_Bacillus_coagulans	0.713992	0.00910117
Leu-Ser	g_Thermoactinomyces	0.713967	0.00910465
Tyramine	g_Microbacterium	0.71394	0.00910852
Thr-Val	g_Lihuaxuella	0.713771	0.00913254
Ile-Phe	g_Streptomyces	0.713737	0.0091374
Ile-Ile	f_Micromonosporaceae	0.713728	0.00913864
Ile-Ile	o_Micromonosporales	0.713728	0.00913864
Ile-Ala	f_Paenibacillaceae	0.713558	0.00916291
Pro-Glu	s_Bacillus_lehensis	0.713551	0.00916391
Ile-Phe	o_Streptomycetales	0.713509	0.00916998
Ile-Phe	f_Streptomycetaceae	0.713509	0.00916998
His-Ile	g_Campylobacter	0.713497	0.00917174
His-Ile	f_Campylobacteraceae	0.713497	0.00917174
Val-Glu	f_Muribaculaceae	0.713088	0.00923031
Thymine	g_Alistipes	0.713062	0.00923403
Pro-Glu	p_Actinobacteria	0.713028	0.00923889
L-Saccharopine	f_Micromonosporaceae	0.712245	0.009352
L-Saccharopine	o_Micromonosporales	0.712245	0.009352
5-Methylcytosine	s_Novosphingobium_capsulatum	0.712113	0.00937105
L-Gulonic_gamma-lactone	g_Bacillus	0.712104	0.00937238
Ala-Lys	f_Paenibacillaceae	0.71205	0.0093803
5-Methylcytosine	g_Novosphingobium	0.712021	0.00938451
Thr-Leu	s_Thermoactinomyces_intermedius	0.712012	0.00938574
myo-Inositol	p_Actinobacteria	0.711794	0.00941756
Thymine	s_Zoogloea_resiniphila	0.711652	0.00943822
Malonic_acid	g_Zoogloea	0.711582	0.0094485
L-Malic_acid	g_Thermoactinomyces	0.711523	0.00945708
L-Alanine	f_Flavobacteriaceae	0.711401	0.00947498
Thr-Leu	f_Heliobacteriaceae	0.711342	0.00948359
L-Gulonic_gamma-lactone	f_Bacillaceae	0.711164	0.00950971
L-Gulonic_gamma-lactone	g_Prevotellaceae-UCG-001	0.710539	0.00960181
L-Gulonic_gamma-lactone	g_Thermobacillus	0.710018	0.00967911
N-Acetyl-DL-methionine	g_Pajaroellobacter	0.709959	0.0096879
Thr-Val	f_Thermoactinomycetaceae	0.709839	0.00970571
L-Gulonic_gamma-lactone	g_Micromonospora	0.709774	0.00971546
Thr-Asp	f_Micromonosporaceae	0.709699	0.00972673
Thr-Asp	o_Micromonosporales	0.709699	0.00972673
Thr-Val	g_Ureibacillus	0.70946	0.00976241
Thr-Phe	c_Sericytochromatia	0.709363	0.00977701
Thr-Phe	f_Sericytochromatia	0.709363	0.00977701
Thr-Phe	o_Sericytochromatia	0.709363	0.00977701
Thr-Phe	g_Sericytochromatia	0.709363	0.00977701
Leu-Ser	c_Bacilli	0.709239	0.0097956
Val-Glu	g_Muribaculaceae	0.708991	0.00983283
Leu-Ser	s_Bacillus_clausii	0.708795	0.00986234
Pro-Glu	s_Bacillus_circulans	0.708314	0.00993521
Tyramine	s_Thermobacillus_xylanilyticus	0.708171	0.00995687
Tyr-Val	f_Micromonosporaceae	0.70784	0.0100072
Tyr-Val	o_Micromonosporales	0.70784	0.0100072
Tyramine	p_Actinobacteria	0.707785	0.0100157
Leu-Ser	g_Laceyella	0.707406	0.0100735
Phe-Pro	s_Thermoactinomyces_daqus	0.707401	0.0100743
Ala-Lys	s_Treponema_porcinum	0.707348	0.0100825
Tyramine	s_Bacillus_clausii	0.707074	0.0101246
Leu-Ser	f_Sporolactobacillaceae	0.707056	0.0101274
Isocitrate	f_Solirubrobacteraceae	0.706774	0.0101708
Tyr-Val	s_Treponema_porcinum	0.706516	0.0102107
Tyramine	f_Heliobacteriaceae	0.706401	0.0102285
Ile-Ala	s_Thermoactinomyces_daqus	0.706213	0.0102578
L-Glutamate	c_Thermoleophilia	0.705774	0.0103262
Ile-Ala	s_Laceyella_sacchari	0.705372	0.010389
Tyr-Val	g_Ureibacillus	0.704852	0.0104709
Acetylcholine	g_Inhella	0.7042	0.010574
3-(3-Hydroxyphenyl)propanoic_acid	g_Flavobacterium	0.70381	0.0106362
Ile-Phe	g_Microbacterium	0.703554	0.0106771
Thr-Leu	g_Thermoactinomyces	0.703511	0.010684
myo-Inositol	s_Brevibacillus_thermoruber	0.703424	0.0106979
Ile-Phe	c_Bacilli	0.703099	0.0107501
Phe-Pro	s_Bacillus_smithii	0.702815	0.0107958
Uracil	o_Clostridiales	0.702525	0.0108427
Uracil	c_Clostridia	0.702486	0.010849
His-Ile	g_Tuberibacillus	0.702425	0.0108589
Malonic_acid	g_Ideonella	0.702193	0.0108966
Val-Glu	f_Micromonosporaceae	0.701962	0.0109341
Val-Glu	o_Micromonosporales	0.701962	0.0109341
Thymine	f_Flavobacteriaceae	0.701787	0.0109627
Uracil	p_Firmicutes	0.701698	0.0109773
Ala-Glu	s_Brevibacillus_thermoruber	0.701457	0.0110168
Ile-Val	g_Micromonospora	0.701358	0.011033
Val-Ile	s_Wallaby_gut	0.701232	0.0110536
Thr-Glu	c_Actinobacteria	0.701183	0.0110616
Tyramine	g_Thermoactinomyces	0.700817	0.011122
Thymine	g_Aquabacterium	0.700285	0.01121
5-Methylcytosine	g_Leuconostoc	0.699724	0.0113034
Thymine	c_Gammaproteobacteria	0.699169	0.0113964
Phe-Pro	s_Thermobacillus_composti	0.698581	0.0114954
Thr-Val	g_Thermoactinomyces	0.698408	0.0115247
Leu-Ser	s_Wallaby_gut	0.698126	0.0115726
Pro-Glu	g_Seinonella	0.69776	0.0116348
Diacetyl	o_Lactobacillales	0.697604	0.0116615
L-Saccharopine	s_Wallaby_gut	0.69717	0.0117358
L-Aspartate	f_Stappiaceae	0.697078	0.0117517
L-Saccharopine	s_Bacillus_circulans	0.696995	0.011766
Galactonic_acid	f_Bacillaceae	0.69694	0.0117754
L-Alanine	o_Solirubrobacterales	0.696911	0.0117803
Diacetyl	g_Pajaroellobacter	0.696793	0.0118008
Thr-Asp	g_Brevibacillus	0.696749	0.0118083
Thr-Asp	s_Thermoactinomyces_daqus	0.696436	0.0118624
Cytosine	c_Thermoleophilia	0.696271	0.011891
Galactonic_acid	g_Bacillus	0.696186	0.0119057
Phe-Pro	f_Thermoactinomycetaceae	0.696055	0.0119284
Val-Glu	g_Paenibacillus	0.695972	0.0119429
Thymine	f_Burkholderiaceae	0.695774	0.0119774
Tyr-Val	g_Tuberibacillus	0.695679	0.011994
Norharmane	g_Coprococcus_3	0.695392	0.0120441
Thymine	o_Betaproteobacteriales	0.69531	0.0120584
L-Saccharopine	s_Bacillus_lehensis	0.69528	0.0120637
N-Acetyl-DL-methionine	s_Zoogloea_resiniphila	0.695246	0.0120697
Phe-Pro	f_Bacillaceae	0.695166	0.0120837
Thr-Val	g_Muribaculaceae	0.694977	0.012117
Phe-Pro	g_Thermoactinomyces	0.694842	0.0121406
Thr-Phe	g_Bacillus	0.694752	0.0121566
Tyr-Val	s_Wallaby_gut	0.694721	0.012162
Norethindrone_Acetate	f_Family-XVIII	0.694286	0.0122389
Cytosine	p_Proteobacteria	0.69421	0.0122523
Ile-Ala	g_Paenibacillus	0.693592	0.0123622
Ala-Glu	s_Wallaby_gut	0.693442	0.012389
Ile-Ala	g_Lysinibacillus	0.693009	0.0124666
Thr-Glu	g_Tuberibacillus	0.69273	0.0125169
5-Methylcytosine	s_Asticcacaulis_sp.	0.692398	0.0125767
Phe-Pro	g_Bacillus	0.692336	0.012588
myo-Inositol	s_Geobacillus_thermodenitrificans	0.692276	0.0125988
Ala-Glu	s_Bacillus_circulans	0.692179	0.0126163
Harmane	s_Zoogloea_resiniphila	0.691982	0.012652
L-Malic_acid	c_Sericytochromatia	0.691864	0.0126735
L-Malic_acid	f_Sericytochromatia	0.691864	0.0126735
L-Malic_acid	o_Sericytochromatia	0.691864	0.0126735
L-Malic_acid	g_Sericytochromatia	0.691864	0.0126735
Malonic_acid	c_Alphaproteobacteria	0.69173	0.0126979
Pro-Glu	c_Sericytochromatia	0.691286	0.0127789
Pro-Glu	f_Sericytochromatia	0.691286	0.0127789
Pro-Glu	o_Sericytochromatia	0.691286	0.0127789
Pro-Glu	g_Sericytochromatia	0.691286	0.0127789
Thr-Val	f_p-251-o5	0.691137	0.0128061
Thr-Val	g_p-251-o5	0.691137	0.0128061
Tyramine	s_Brevibacillus_thermoruber	0.690934	0.0128434
L-Aspartate	o_Sphingomonadales	0.690933	0.0128435
L-Aspartate	f_Sphingomonadaceae	0.690933	0.0128435
5-Methylcytosine	g_Ideonella	0.69087	0.012855
Val-Ile	f_Sporolactobacillaceae	0.690791	0.0128697
D-Threitol	g_Zoogloea	0.69074	0.012879
Phe-Pro	s_Treponema_porcinum	0.690357	0.0129496
Ile-Pro	s_Wallaby_gut	0.690316	0.0129572
Tyramine	s_Bacillus_ginsengihumi	0.689596	0.0130907
Thr-Glu	p_Actinobacteria	0.689363	0.0131342
Tyr-Val	s_Thermoactinomyces_daqus	0.689216	0.0131617
Thr-Phe	f_Bacillaceae	0.689181	0.0131682
Thr-Leu	s_Bacillus_lehensis	0.689065	0.01319
L-Saccharopine	s_Brevibacillus_thermoruber	0.688991	0.0132037
N-Acetyl-DL-methionine	o_Flavobacteriales	0.688915	0.013218
myo-Inositol	f_Thermoactinomycetaceae	0.688834	0.0132332
L-Gulonic_gamma-lactone	g_Tuberibacillus	0.688729	0.0132528
Ile-Ile	g_Laceyella	0.688725	0.0132537
Ile-Ala	s_Bacillus_clausii	0.688057	0.0133796
Ala-Glu	g_Campylobacter	0.688054	0.0133802
Ala-Glu	f_Campylobacteraceae	0.688054	0.0133802
Thr-Asp	g_Prevotellaceae-UCG-001	0.687897	0.0134099
L-Gulonic_gamma-lactone	g_Paenibacillus	0.687694	0.0134484
Norethindrone_Acetate	s_Thermobacillus_composti	0.687175	0.0135472
Ile-Pro	o_Streptomycetales	0.687115	0.0135587
Ile-Pro	f_Streptomycetaceae	0.687115	0.0135587
Norethindrone_Acetate	o_Streptomycetales	0.68705	0.0135712
Norethindrone_Acetate	f_Streptomycetaceae	0.68705	0.0135712
Norethindrone_Acetate	g_Streptomyces	0.686964	0.0135875
D-Threitol	o_Solirubrobacterales	0.686943	0.0135917
Thr-Val	f_Muribaculaceae	0.68694	0.0135922
L-Aspartate	s_Novosphingobium_capsulatum	0.686749	0.0136288
L-Aspartate	g_Novosphingobium	0.686625	0.0136526
Ile-Pro	g_Streptomyces	0.686418	0.0136925
Diacetyl	g_Ideonella	0.686334	0.0137086
myo-Inositol	s_Bacillus_lehensis	0.686089	0.0137558
Galactonic_acid	g_Thermobacillus	0.685945	0.0137836
Pro-Glu	g_Campylobacter	0.685583	0.0138538
Pro-Glu	f_Campylobacteraceae	0.685583	0.0138538
myo-Inositol	g_Clostridium-sensu-stricto-13	0.685519	0.0138662
5-Methylcytosine	s_Alistipes_finegoldii	0.685375	0.0138941
Thr-Phe	g_Paenibacillus	0.685199	0.0139286
Harmane	o_Solirubrobacterales	0.68496	0.0139751
5-Methylcytosine	g_Asticcacaulis	0.684897	0.0139875
Thr-Glu	s_Brevibacillus_thermoruber	0.684822	0.0140021
D-Threitol	o_Flavobacteriales	0.684745	0.0140173
Acetylcholine	o_Lactobacillales	0.684616	0.0140425
Val-Ile	s_Thermoactinomyces_daqus	0.684207	0.0141228
Isocitrate	o_Azospirillales	0.683575	0.0142476
Isocitrate	f_Azospirillaceae	0.683575	0.0142476
L-Malic_acid	f_Heliobacteriaceae	0.683385	0.0142854
Ala-Glu	f_Paludibacteraceae	0.683378	0.0142869
Ile-Phe	s_Bacillus_ginsengihumi	0.683349	0.0142925
D-Lyxose	s_Novosphingobium_capsulatum	0.683057	0.0143506
D-Lyxose	o_Sphingomonadales	0.682517	0.0144586
D-Lyxose	f_Sphingomonadaceae	0.682517	0.0144586
Isocitrate	g_Azospirillum	0.682036	0.0145552
Thymine	g_Zoogloea	0.681991	0.0145641
Thr-Asp	s_Thermobacillus_xylanilyticus	0.681599	0.0146433
Ile-Pro	g_Thermobacillus	0.68158	0.0146472
His-Ile	s_Brevibacillus_thermoruber	0.681548	0.0146536
Malonic_acid	f_Flavobacteriaceae	0.681319	0.0147001
Ile-Glu	g_Micromonospora	0.680863	0.0147927
L-Malic_acid	s_Thermoactinomyces_daqus	0.680685	0.0148292
Norethindrone_Acetate	f_Paenibacillaceae	0.680408	0.0148858
D-Lyxose	g_Novosphingobium	0.680306	0.0149067
L-Malic_acid	g_Tuberibacillus	0.67995	0.0149797
Phe-Pro	s_Bacillus_clausii	0.67989	0.0149921
myo-Inositol	f_Micromonosporaceae	0.679757	0.0150194
myo-Inositol	o_Micromonosporales	0.679757	0.0150194
Ala-Lys	c_Bacilli	0.67919	0.0151365
Ile-Ala	s_Bacillus_circulans	0.679176	0.0151396
Ile-Ala	s_Bacillus_ginsengihumi	0.679011	0.0151737
Thr-Glu	s_Bacillus_circulans	0.678694	0.0152396
Isocitrate	o_Solirubrobacterales	0.678553	0.0152691
L-Saccharopine	f_Paludibacteraceae	0.678543	0.0152712
Ala-Lys	s_Bacillus_ginsengihumi	0.677769	0.0154332
myo-Inositol	s_Bacillus_clausii	0.67758	0.015473
Leu-Ser	s_Bacillus_circulans	0.677463	0.0154977
Ile-Ala	s_Paenibacillus_barengoltzii	0.6773	0.0155321
Harmane	g_Leuconostoc	0.677249	0.0155427
Thr-Asp	f_Sporolactobacillaceae	0.677239	0.0155449
3-(3-Hydroxyphenyl)propanoic_acid	g_Zoogloea	0.677137	0.0155665
Ile-Phe	g_Brevibacillus	0.677008	0.0155938
Galactonic_acid	o_Bacillales	0.676771	0.0156441
5-Methylcytosine	g_Alistipes	0.676346	0.0157344
Thr-Val	f_Heliobacteriaceae	0.676334	0.015737
L-Gulonic_gamma-lactone	o_Bacillales	0.676278	0.015749
Ala-Glu	s_Thermobacillus_xylanilyticus	0.676264	0.0157519
Ile-Ile	s_Brevibacillus_thermoruber	0.676107	0.0157854
Leu-Ser	s_Laceyella_sacchari	0.67602	0.015804
Harmane	g_Zoogloea	0.675492	0.0159175
L-Glutamate	g_Leuconostoc	0.67543	0.0159307
Norethindrone_Acetate	g_Coprococcus_3	0.675396	0.0159381
Tyramine	g_Tuberibacillus	0.675288	0.0159613
myo-Inositol	g_Geobacillus	0.675222	0.0159755
N-Acetyl-DL-methionine	s_Novosphingobium_capsulatum	0.675018	0.0160196
L-Saccharopine	s_Thermobacillus_xylanilyticus	0.674955	0.0160331
L-Aspartate	o_Solirubrobacterales	0.674706	0.0160872
5-Methylcytosine	g_Inhella	0.674488	0.0161344
Leu-Ser	g_Brevibacillus	0.674383	0.0161573
N-Acetyl-DL-methionine	o_Sphingomonadales	0.674359	0.0161625
N-Acetyl-DL-methionine	f_Sphingomonadaceae	0.674359	0.0161625
Ile-Ile	s_Klebsiella_pneumoniae	0.674326	0.0161696
His-Ile	g_Laceyella	0.674239	0.0161886
D-Lyxose	g_Pajaroellobacter	0.673613	0.0163252
D-Threitol	o_Acidobacteriales	0.673546	0.01634
Phe-Pro	f_Paenibacillaceae	0.673444	0.0163623
Thr-Leu	s_Geobacillus_thermodenitrificans	0.673263	0.0164022
Norethindrone_Acetate	f_Micromonosporaceae	0.673258	0.0164032
Norethindrone_Acetate	o_Micromonosporales	0.673258	0.0164032
L-Alanine	c_Thermoleophilia	0.673175	0.0164214
N-Acetyl-DL-methionine	g_Novosphingobium	0.67309	0.0164402
myo-Inositol	g_Thermoactinomyces	0.67308	0.0164425
L-Glutamate	f_Bacteriovoracaceae	0.672304	0.016614
L-Glutamate	g_Peredibacter	0.672304	0.016614
Ile-Pro	s_Paenibacillus_barengoltzii	0.67229	0.016617
Uracil	f_Sporolactobacillaceae	0.67213	0.0166526
Thr-Leu	g_Clostridium-sensu-stricto-13	0.672016	0.0166779
L-Aspartate	g_Pannonibacter	0.671771	0.0167327
L-Glutamate	g_Asticcacaulis	0.671263	0.0168462
Dulcitol	c_Gammaproteobacteria	0.671065	0.0168907
L-Malic_acid	s_Bacillus_circulans	0.671002	0.0169048
Ile-Glu	s_Treponema_porcinum	0.670904	0.0169268
Malonic_acid	o_Acidobacteriales	0.670476	0.0170233
Thr-Val	g_Coprococcus_3	0.670132	0.0171012
Pro-Glu	g_Laceyella	0.669959	0.0171405
Harmane	c_Thermoleophilia	0.669457	0.0172547
Thr-Val	s_Treponema_porcinum	0.669261	0.0172994
Norethindrone_Acetate	g_Seinonella	0.66885	0.0173935
His-Ile	s_Bacillus_circulans	0.668809	0.0174031
Thr-Leu	g_Microbacterium	0.668685	0.0174314
Leu-Ser	g_Prevotellaceae-UCG-001	0.668462	0.0174828
Acetylcholine	c_Alphaproteobacteria	0.668304	0.0175193
Leu-Ser	g_Seinonella	0.668194	0.0175446
L-Alanine	f_Stappiaceae	0.668133	0.0175587
Ile-Phe	p_Firmicutes	0.667991	0.0175916
Isocitrate	c_Alphaproteobacteria	0.667533	0.0176978
Tyramine	f_Family-XVIII	0.6672	0.0177755
L-Threonine	o_Flavobacteriales	0.666933	0.0178377
L-Malic_acid	f_Family-XVIII	0.66672	0.0178876
Diacetyl	g_Inhella	0.666613	0.0179126
L-Gulonic_gamma-lactone	s_Thermoactinomyces_intermedius	0.666389	0.0179653
Norharmane	p_Firmicutes	0.666116	0.0180296
Ile-Pro	s_Thermobacillus_composti	0.665901	0.0180803
L-Gulonic_gamma-lactone	s_Bacillus_ginsengihumi	0.665809	0.0181019
L-Aspartate	o_Rhizobiales	0.66563	0.0181443
Galactonic_acid	s_Paenibacillus_barengoltzii	0.665104	0.0182693
His-Ile	g_Seinonella	0.664748	0.0183541
Tyramine	s_Bacillus_shackletonii	0.664735	0.0183571
Thr-Val	g_Campylobacter	0.664713	0.0183623
Thr-Val	f_Campylobacteraceae	0.664713	0.0183623
L-Glutamate	o_Sphingomonadales	0.664567	0.0183972
L-Glutamate	f_Sphingomonadaceae	0.664567	0.0183972
Galactonic_acid	s_Thermoactinomyces_daqus	0.664484	0.0184172
Pro-Glu	s_Klebsiella_pneumoniae	0.664129	0.0185023
3-(3-Hydroxyphenyl)propanoic_acid	c_Alphaproteobacteria	0.663831	0.018574
3-(3-Hydroxyphenyl)propanoic_acid	f_Solirubrobacteraceae	0.663783	0.0185856
Norethindrone_Acetate	g_Lihuaxuella	0.663285	0.0187059
Phe-Pro	s_Bacillus_coagulans	0.663177	0.0187321
Tyramine	s_Thermoactinomyces_intermedius	0.662874	0.0188056
Thr-Val	f_Micromonosporaceae	0.662565	0.0188809
Thr-Val	o_Micromonosporales	0.662565	0.0188809
Acetylcholine	f_Flavobacteriaceae	0.662524	0.0188908
Uracil	s_Thermoactinomyces_intermedius	0.662421	0.0189159
L-Saccharopine	g_Campylobacter	0.662202	0.0189695
L-Saccharopine	f_Campylobacteraceae	0.662202	0.0189695
Galactonic_acid	s_Bacillus_coagulans	0.661934	0.0190351
Ile-Phe	g_Polyangium	0.661857	0.0190539
D-Threitol	f_Stappiaceae	0.661787	0.019071
Harmane	f_Flavobacteriaceae	0.66163	0.0191097
Leu-Ser	p_Firmicutes	0.661548	0.0191299
L-Saccharopine	g_Seinonella	0.661499	0.0191419
5-Methylcytosine	o_Caulobacterales	0.661038	0.0192556
L-Gulonic_gamma-lactone	s_Brevibacillus_thermoruber	0.660684	0.0193433
5-Methylcytosine	f_Caulobacteraceae	0.660523	0.0193834
Harmane	o_Lactobacillales	0.660391	0.0194162
Dulcitol	g_Aquabacterium	0.659979	0.0195189
Thr-Phe	s_Bacillus_coagulans	0.659965	0.0195225
Ile-Glu	f_Paludibacteraceae	0.659725	0.0195824
Diacetyl	f_Flavobacteriaceae	0.659553	0.0196256
His-Ile	s_Bacillus_lehensis	0.659405	0.0196626
L-Glutamate	s_Novosphingobium_capsulatum	0.659142	0.0197287
Ala-Glu	s_Bacillus_lehensis	0.65906	0.0197494
L-Glutamate	g_Novosphingobium	0.659005	0.0197632
Tyramine	s_Thermoactinomyces_daqus	0.658939	0.0197799
Thr-Asp	c_Actinobacteria	0.658903	0.019789
L-Gulonic_gamma-lactone	s_Bacillus_smithii	0.658751	0.0198274
Ile-Ile	s_Thermobacillus_xylanilyticus	0.658726	0.0198337
3-(3-Hydroxyphenyl)propanoic_acid	s_Zoogloea_resiniphila	0.658458	0.0199015
Ile-Ile	g_Microbacterium	0.658438	0.0199064
N-Acetyl-DL-methionine	g_Zoogloea	0.658432	0.019908
Thr-Leu	g_Geobacillus	0.658158	0.0199776
Thr-Leu	s_Bacillus_clausii	0.658131	0.0199844
Val-Glu	p_Actinobacteria	0.657839	0.0200588
Galactonic_acid	s_Bacillus_clausii	0.657794	0.0200701
Ile-Pro	f_Bacillaceae	0.657739	0.0200841
Phytosphingosine	s_Weissella_paramesenteroides	0.657705	0.0200928
3-(3-Hydroxyphenyl)propanoic_acid	f_Leuconostocaceae	0.657645	0.0201081
Ile-Pro	g_Bacillus	0.657606	0.0201181
Ile-Val	f_Heliobacteriaceae	0.657437	0.0201615
Pro-Glu	g_Microbacterium	0.657299	0.0201967
Tyramine	s_Brevibacillus_sp.	0.657084	0.0202519
Val-Ile	s_Bacillus_circulans	0.656803	0.0203239
3-(3-Hydroxyphenyl)propanoic_acid	s_Sphingobacterium_faecium	0.656084	0.0205095
Cytosine	o_Sphingomonadales	0.656067	0.0205139
Cytosine	f_Sphingomonadaceae	0.656067	0.0205139
Thr-Glu	s_Thermobacillus_xylanilyticus	0.655245	0.0207278
D-Lyxose	f_Flavobacteriaceae	0.655211	0.0207365
Val-Glu	g_Tuberibacillus	0.655072	0.0207729
Dulcitol	f_Burkholderiaceae	0.654952	0.0208043
3-(3-Hydroxyphenyl)propanoic_acid	g_Weissella	0.654693	0.020872
Diacetyl	c_Alphaproteobacteria	0.654542	0.0209118
3-(3-Hydroxyphenyl)propanoic_acid	g_Pajaroellobacter	0.654486	0.0209265
Dulcitol	o_Betaproteobacteriales	0.654273	0.0209825
Malonic_acid	f_Stappiaceae	0.654229	0.0209942
His-Ile	s_Thermobacillus_xylanilyticus	0.653827	0.0211001
Val-Glu	c_Actinobacteria	0.653771	0.021115
myo-Inositol	s_Thermoactinomyces_intermedius	0.653747	0.0211213
Ile-Pro	s_Bacillus_ginsengihumi	0.653745	0.0211219
Cytosine	s_Novosphingobium_capsulatum	0.653427	0.0212062
D-Lyxose	s_Zoogloea_resiniphila	0.65342	0.0212079
Cytosine	o_Betaproteobacteriales	0.653391	0.0212156
Ile-Ile	s_Bacillus_lehensis	0.652911	0.0213434
Malonic_acid	o_Rhizobiales	0.652844	0.0213611
Cytosine	f_Burkholderiaceae	0.652819	0.021368
Tyr-Val	s_Bacillus_lehensis	0.652737	0.0213897
Ile-Pro	o_Bacillales	0.652578	0.0214323
Phytosphingosine	f_Solirubrobacteraceae	0.652559	0.0214374
myo-Inositol	f_Heliobacteriaceae	0.652535	0.0214438
L-Alanine	o_Flavobacteriales	0.652483	0.0214578
myo-Inositol	s_Bacillus_circulans	0.65245	0.0214665
D-Threitol	c_Alphaproteobacteria	0.652419	0.0214748
Tyramine	g_Clostridium-sensu-stricto-8	0.652324	0.0215003
L-Alanine	s_Zoogloea_resiniphila	0.652076	0.0215667
3-(3-Hydroxyphenyl)propanoic_acid	o_Solirubrobacterales	0.652033	0.0215782
Thr-Leu	s_Klebsiella_pneumoniae	0.651972	0.0215947
Cytosine	g_Novosphingobium	0.65146	0.0217327
Ile-Phe	g_Lihuaxuella	0.651336	0.0217661
L-Saccharopine	s_Klebsiella_pneumoniae	0.651325	0.0217691
Cytosine	g_Leuconostoc	0.651112	0.0218268
Val-Glu	p_Firmicutes	0.650992	0.0218594
Ile-Phe	s_Treponema_porcinum	0.650699	0.0219391
Val-Glu	s_Bacillus_ginsengihumi	0.650385	0.0220246
Ile-Phe	s_Brevibacillus_sp.	0.650342	0.0220364
Thr-Asp	g_Polyangium	0.650304	0.0220467
Ile-Ile	g_Clostridium-sensu-stricto-8	0.650299	0.0220479
Dulcitol	f_Paracaedibacteraceae	0.649951	0.0221431
Dulcitol	o_Paracaedibacterales	0.649951	0.0221431
Galactonic_acid	g_Lysinibacillus	0.649827	0.022177
5-Methylcytosine	o_Lactobacillales	0.649791	0.0221871
myo-Inositol	g_Microbacterium	0.649477	0.0222732
Malonic_acid	g_Inhella	0.649211	0.0223465
Val-Glu	g_Bacillus	0.648786	0.0224638
Malonic_acid	o_Flavobacteriales	0.648554	0.0225282
Ile-Ile	c_Actinobacteria	0.648502	0.0225427
L-Aspartate	o_Lactobacillales	0.648465	0.0225527
Thr-Glu	g_Campylobacter	0.648239	0.0226157
Thr-Glu	f_Campylobacteraceae	0.648239	0.0226157
myo-Inositol	s_Klebsiella_pneumoniae	0.647735	0.0227562
Ile-Glu	g_Microbacterium	0.64755	0.0228078
Ile-Glu	g_Coprococcus_3	0.647546	0.0228089
Val-Glu	s_Bacillus_smithii	0.647417	0.022845
Thr-Val	g_Brevibacillus	0.646937	0.0229798
Thr-Phe	g_Thermobacillus	0.646855	0.023003
L-Saccharopine	f_Family-XVIII	0.646754	0.0230312
Malonic_acid	s_Sphingobacterium_faecium	0.646735	0.0230367
Cytosine	g_Aquabacterium	0.646719	0.0230411
Galactonic_acid	g_Thermoactinomyces	0.646588	0.0230782
Thymine	f_Stappiaceae	0.646285	0.0231637
Val-Glu	f_Bacillaceae	0.646279	0.0231654
L-Aspartate	f_Flavobacteriaceae	0.646173	0.0231955
Pro-Glu	g_Micromonospora	0.646158	0.0231998
Ile-Glu	s_Thermoactinomyces_daqus	0.645909	0.0232702
L-Malic_acid	s_Bacillus_lehensis	0.645829	0.023293
Galactonic_acid	f_Thermoactinomycetaceae	0.645782	0.0233063
Cytosine	g_Pajaroellobacter	0.645728	0.0233218
L-Alanine	g_Pannonibacter	0.645597	0.023359
Thr-Glu	s_Bacillus_lehensis	0.645556	0.0233708
Thr-Asp	p_Actinobacteria	0.645482	0.0233918
L-Alanine	g_Ideonella	0.645425	0.023408
Thr-Glu	s_Klebsiella_pneumoniae	0.645268	0.0234527
Thr-Val	s_Bacillus_clausii	0.645261	0.0234548
myo-Inositol	s_Paenibacillus_ginsengihumi	0.645083	0.0235058
Ile-Pro	g_Thermoactinomyces	0.644428	0.0236935
Val-Glu	s_Bacillus_coagulans	0.644006	0.0238152
Val-Glu	g_Lihuaxuella	0.643848	0.0238607
Ile-Phe	s_Bacillus_circulans	0.64377	0.0238835
Ile-Glu	s_Klebsiella_pneumoniae	0.643674	0.0239111
Ile-Ile	g_Campylobacter	0.643656	0.0239163
Ile-Ile	f_Campylobacteraceae	0.643656	0.0239163
Ile-Pro	g_Paenibacillus	0.643604	0.0239315
Ile-Phe	g_Ureibacillus	0.64329	0.0240224
Leu-Ser	g_Lihuaxuella	0.643143	0.0240652
L-Malic_acid	s_Klebsiella_pneumoniae	0.642835	0.024155
Ile-Ile	g_Seinonella	0.642617	0.0242187
Ala-Lys	p_Firmicutes	0.642572	0.0242319
N-Acetyl-DL-methionine	p_Proteobacteria	0.641971	0.0244079
L-Alanine	o_Rhizobiales	0.641464	0.0245574
Uracil	c_Bacilli	0.641359	0.0245884
Phytosphingosine	f_Leuconostocaceae	0.641265	0.0246161
L-Malic_acid	s_Brevibacillus_thermoruber	0.64123	0.0246264
Ile-Pro	f_Thermoactinomycetaceae	0.641202	0.0246348
Phe-Pro	s_Thermobacillus_xylanilyticus	0.640828	0.0247458
L-Gulonic_gamma-lactone	f_Paenibacillaceae	0.640616	0.0248086
D-Threitol	g_Pannonibacter	0.640477	0.02485
Ala-Glu	f_Family-XVIII	0.640311	0.0248996
Malonic_acid	c_Thermoleophilia	0.640265	0.0249131
Galactonic_acid	s_Thermobacillus_composti	0.640228	0.0249244
Phytosphingosine	g_Weissella	0.640181	0.0249384
Thymine	o_Acidobacteriales	0.640038	0.0249811
Ile-Glu	s_Bacillus_circulans	0.640025	0.0249849
Tyr-Val	g_Brevibacillus	0.639597	0.0251131
Val-Ile	s_Klebsiella_pneumoniae	0.639437	0.025161
D-Threitol	g_Ideonella	0.639307	0.0252002
Uracil	f_Christensenellaceae	0.639051	0.0252772
L-Saccharopine	g_Microbacterium	0.638891	0.0253255
Uracil	g_Christensenellaceae-R-7-group	0.638866	0.025333
Thr-Leu	g_Campylobacter	0.638806	0.0253511
Thr-Leu	f_Campylobacteraceae	0.638806	0.0253511
L-Malic_acid	g_Prevotellaceae-UCG-004	0.63872	0.0253771
Ala-Glu	f_Heliobacteriaceae	0.638441	0.0254615
Malonic_acid	g_Pannonibacter	0.638359	0.0254865
L-Alanine	s_Alistipes_finegoldii	0.638125	0.0255575
Ile-Glu	g_Campylobacter	0.637785	0.0256609
Ile-Glu	f_Campylobacteraceae	0.637785	0.0256609
Ile-Ile	s_Laceyella_sacchari	0.637718	0.0256814
Phytosphingosine	g_Pajaroellobacter	0.637595	0.025719
Ile-Ile	p_Actinobacteria	0.637395	0.0257801
Cytosine	c_Gammaproteobacteria	0.637188	0.0258434
Ala-Glu	g_Seinonella	0.637156	0.0258533
Thr-Leu	s_Thermoactinomyces_daqus	0.637007	0.0258991
D-Threitol	c_Thermoleophilia	0.63685	0.0259472
Thr-Glu	g_Microbacterium	0.63657	0.0260334
L-Aspartate	g_Pajaroellobacter	0.636414	0.0260814
5-Methylcytosine	c_Alphaproteobacteria	0.635981	0.026215
Ala-Glu	s_Klebsiella_pneumoniae	0.63578	0.0262773
Uracil	f_p-251-o5	0.635583	0.0263384
Uracil	g_p-251-o5	0.635583	0.0263384
Ile-Val	f_Paludibacteraceae	0.635526	0.0263563
Val-Ile	s_Brevibacillus_thermoruber	0.635389	0.0263987
Phe-Pro	g_Paenibacillus	0.635025	0.0265124
N-Acetyl-DL-methionine	o_Solirubrobacterales	0.634562	0.0266571
Phe-Pro	s_Paenibacillus_barengoltzii	0.634389	0.0267113
Thr-Leu	s_Brevibacillus_sp.	0.634376	0.0267153
Dulcitol	s_Alistipes_finegoldii	0.634366	0.0267186
Leu-Ser	c_Sericytochromatia	0.634296	0.0267405
Leu-Ser	f_Sericytochromatia	0.634296	0.0267405
Leu-Ser	o_Sericytochromatia	0.634296	0.0267405
Leu-Ser	g_Sericytochromatia	0.634296	0.0267405
D-Threitol	s_Alistipes_finegoldii	0.634152	0.0267857
Phytosphingosine	f_Bacteriovoracaceae	0.633875	0.026873
Phytosphingosine	g_Peredibacter	0.633875	0.026873
Isocitrate	g_Pajaroellobacter	0.633343	0.027041
Galactonic_acid	g_Seinonella	0.633318	0.0270488
Ile-Ile	g_Tuberibacillus	0.632557	0.0272905
L-Malic_acid	f_Clostridiaceae-1	0.631794	0.0275344
Uracil	s_Bacillus_coagulans	0.631527	0.0276203
D-Lyxose	g_Zoogloea	0.631142	0.0277441
Thr-Glu	g_Micromonospora	0.630445	0.0279695
Ile-Ala	g_Brevibacillus	0.630103	0.0280806
Malonic_acid	f_Solirubrobacteraceae	0.629915	0.0281421
Tyr-Val	g_Campylobacter	0.629666	0.028223
Tyr-Val	f_Campylobacteraceae	0.629666	0.028223
Ala-Glu	g_Micromonospora	0.629257	0.0283568
Phytosphingosine	g_Caulobacter	0.629208	0.0283728
Galactonic_acid	g_Paenibacillus	0.629198	0.0283761
Ile-Val	g_Seinonella	0.628852	0.0284899
Tyramine	s_Bacillus_lehensis	0.628846	0.0284916
Thr-Leu	g_Seinonella	0.628629	0.028563
Val-Ile	g_Microbacterium	0.628597	0.0285738
Ala-Glu	g_Microbacterium	0.628469	0.0286158
L-Saccharopine	g_Coprococcus_3	0.628411	0.0286349
myo-Inositol	s_Thermoactinomyces_daqus	0.628126	0.0287291
L-Saccharopine	g_Laceyella	0.627935	0.0287923
Ile-Glu	f_Family-XVIII	0.627881	0.0288104
Pro-Glu	f_Family-XVIII	0.62752	0.02893
L-Alanine	c_Alphaproteobacteria	0.627334	0.028992
Val-Ile	s_Treponema_porcinum	0.627324	0.0289951
Thr-Glu	g_Laceyella	0.627234	0.0290251
Leu-Ser	f_Micromonosporaceae	0.627166	0.0290481
Leu-Ser	o_Micromonosporales	0.627166	0.0290481
Ile-Glu	g_Clostridium-sensu-stricto-13	0.62696	0.0291167
Tyr-Val	f_Family-XVIII	0.62668	0.0292103
Pro-Glu	s_Laceyella_sacchari	0.626426	0.0292953
Ile-Val	f_Family-XVIII	0.626009	0.0294356
L-Alanine	g_Alistipes	0.625686	0.0295442
Tyramine	g_Campylobacter	0.625588	0.0295773
Tyramine	f_Campylobacteraceae	0.625588	0.0295773
L-Malic_acid	f_Micromonosporaceae	0.625491	0.02961
L-Malic_acid	o_Micromonosporales	0.625491	0.02961
Tyr-Val	f_Paludibacteraceae	0.625437	0.0296285
Pro-Glu	f_Paludibacteraceae	0.625267	0.029686
Tyr-Val	g_Seinonella	0.624725	0.0298697
Ile-Glu	s_Wallaby_gut	0.624624	0.0299043
Ala-Lys	c_Actinobacteria	0.624222	0.0300412
Cytosine	g_Ideonella	0.624177	0.0300567
Ile-Glu	s_Bacillus_lehensis	0.624077	0.0300906
Val-Glu	g_Thermobacillus	0.623942	0.0301371
Ala-Lys	g_Geobacillus	0.62393	0.030141
Dulcitol	g_Alistipes	0.62384	0.030172
Isocitrate	f_Flavobacteriaceae	0.623795	0.0301874
Norethindrone_Acetate	s_Bacillus_smithii	0.623728	0.0302102
L-Alanine	g_Zoogloea	0.623198	0.0303923
L-Saccharopine	f_Heliobacteriaceae	0.623076	0.0304345
Thr-Asp	g_Laceyella	0.623044	0.0304457
5-Methylcytosine	s_Zoogloea_resiniphila	0.622994	0.0304628
Pro-Glu	s_Paenibacillus_ginsengihumi	0.622494	0.0306357
Ile-Glu	c_Sericytochromatia	0.622489	0.0306374
Ile-Glu	f_Sericytochromatia	0.622489	0.0306374
Ile-Glu	o_Sericytochromatia	0.622489	0.0306374
Ile-Glu	g_Sericytochromatia	0.622489	0.0306374
Ile-Ile	s_Paenibacillus_ginsengihumi	0.622332	0.0306918
D-Threitol	g_Alistipes	0.621947	0.0308253
N-Acetyl-DL-methionine	o_Acidobacteriales	0.621857	0.0308569
Thymine	g_Pannonibacter	0.621753	0.030893
myo-Inositol	g_Micromonospora	0.621499	0.0309817
Thr-Val	s_Wallaby_gut	0.621435	0.0310038
Isocitrate	f_Paracaedibacteraceae	0.621382	0.0310224
Isocitrate	o_Paracaedibacterales	0.621382	0.0310224
Cytosine	g_Inhella	0.621269	0.0310621
Ile-Val	s_Bacillus_lehensis	0.62098	0.0311633
Dulcitol	f_Solirubrobacteraceae	0.620818	0.03122
Thymine	o_Flavobacteriales	0.620622	0.0312889
Thymine	c_Alphaproteobacteria	0.620534	0.03132
L-Malic_acid	g_Microbacterium	0.620465	0.031344
5-Methylcytosine	g_Caulobacter	0.620078	0.0314807
Ala-Lys	s_Geobacillus_thermodenitrificans	0.620021	0.0315009
Malonic_acid	f_Paracaedibacteraceae	0.61969	0.0316179
Malonic_acid	o_Paracaedibacterales	0.61969	0.0316179
D-Threitol	o_Rhizobiales	0.619566	0.0316619
His-Ile	s_Laceyella_sacchari	0.619533	0.0316736
His-Ile	f_Paludibacteraceae	0.61927	0.031767
Isocitrate	o_Flavobacteriales	0.618791	0.0319376
Thr-Glu	g_Seinonella	0.618731	0.0319589
5-Methylcytosine	c_Thermoleophilia	0.618623	0.0319976
Thr-Asp	s_Bacillus_circulans	0.618382	0.0320839
L-Aspartate	g_Ideonella	0.617605	0.0323627
His-Ile	g_Micromonospora	0.617459	0.0324154
Ile-Pro	s_Bacillus_coagulans	0.617426	0.0324275
Val-Glu	o_Streptomycetales	0.617357	0.0324523
Val-Glu	f_Streptomycetaceae	0.617357	0.0324523
Val-Glu	s_Thermoactinomyces_intermedius	0.616836	0.0326407
Val-Glu	s_Thermobacillus_composti	0.616782	0.0326602
Val-Glu	g_Streptomyces	0.616677	0.0326983
L-Glutamate	c_Alphaproteobacteria	0.616538	0.0327489
L-Glutamate	s_Asticcacaulis_sp.	0.6161	0.0329082
L-Gulonic_gamma-lactone	f_Sporolactobacillaceae	0.615573	0.033101
Dulcitol	o_Solirubrobacterales	0.615446	0.0331472
Phe-Pro	s_Bacillus_circulans	0.615379	0.0331721
Ala-Glu	g_Coprococcus_3	0.615203	0.0332367
L-Glutamate	s_Alistipes_finegoldii	0.615197	0.0332386
Thr-Phe	o_Bacillales	0.614694	0.0334239
Tyr-Val	g_Prevotellaceae-UCG-004	0.614634	0.0334458
N-Acetyl-DL-methionine	g_Aquabacterium	0.614617	0.0334524
Phe-Pro	s_Bacillus_ginsengihumi	0.614521	0.0334878
Ile-Glu	s_Paenibacillus_ginsengihumi	0.614002	0.0336795
Ile-Phe	f_Thermoactinomycetaceae	0.613885	0.0337231
Ile-Pro	f_Micromonosporaceae	0.613488	0.0338705
Ile-Pro	o_Micromonosporales	0.613488	0.0338705
N-Acetyl-DL-methionine	s_Alistipes_finegoldii	0.613433	0.0338909
L-Alanine	o_Acidobacteriales	0.613423	0.0338949
5-Methylcytosine	f_Flavobacteriaceae	0.613327	0.0339304
L-Malic_acid	g_Campylobacter	0.613289	0.0339447
L-Malic_acid	f_Campylobacteraceae	0.613289	0.0339447
Ile-Val	s_Bacillus_circulans	0.612983	0.0340588
L-Alanine	g_Inhella	0.612656	0.0341812
Tyramine	g_Prevotellaceae-UCG-004	0.612441	0.0342619
Acetylcholine	o_Flavobacteriales	0.612346	0.0342975
Ile-Val	g_Prevotellaceae-UCG-004	0.612124	0.0343811
Ala-Glu	s_Paenibacillus_ginsengihumi	0.612031	0.0344162
L-Aspartate	g_Inhella	0.611785	0.034509
Acetylcholine	g_Caulobacter	0.61167	0.0345521
Ile-Ala	c_Bacilli	0.611532	0.0346045
Thymine	o_Rhizobiales	0.611351	0.0346729
myo-Inositol	g_Seinonella	0.611132	0.0347557
Thymine	o_Solirubrobacterales	0.610926	0.0348341
Harmane	o_Caulobacterales	0.610919	0.0348366
myo-Inositol	g_Muribaculaceae	0.610886	0.0348493
Ile-Ala	s_Treponema_porcinum	0.610688	0.0349245
D-Lyxose	o_Acidobacteriales	0.61063	0.0349467
Val-Glu	c_Bacilli	0.610592	0.034961
Ala-Glu	g_Prevotellaceae-UCG-004	0.610569	0.0349697
Acetylcholine	s_Zoogloea_resiniphila	0.610195	0.0351123
Tyramine	g_Gluconobacter	0.610168	0.0351225
Thr-Leu	g_Muribaculaceae	0.610108	0.0351457
Harmane	f_Caulobacteraceae	0.610045	0.0351697
Harmane	o_Flavobacteriales	0.609463	0.0353928
L-Saccharopine	g_Micromonospora	0.608871	0.0356208
L-Threonine	f_Solirubrobacteraceae	0.608853	0.0356277
Uracil	g_Gluconobacter	0.608479	0.0357721
Ile-Glu	f_Heliobacteriaceae	0.607967	0.0359708
Ala-Lys	p_Actinobacteria	0.607957	0.0359747
Ile-Glu	s_Brevibacillus_sp.	0.607858	0.0360129
N-Acetyl-DL-methionine	g_Alistipes	0.607483	0.0361593
Val-Glu	f_Clostridiaceae-1	0.6072	0.0362698
3-(3-Hydroxyphenyl)propanoic_acid	g_Leuconostoc	0.607063	0.0363233
Val-Glu	g_Coprococcus_3	0.606656	0.0364827
Thr-Val	s_Brevibacillus_thermoruber	0.606392	0.0365864
Ile-Ala	g_Ureibacillus	0.606315	0.0366168
Val-Ile	g_Micromonospora	0.605565	0.0369129
Uracil	s_Bacillus_ginsengihumi	0.605541	0.0369222
Thr-Asp	g_Clostridium-sensu-stricto-8	0.605477	0.0369478
Cytosine	o_Solirubrobacterales	0.605165	0.0370713
Ile-Phe	g_Clostridium-sensu-stricto-13	0.604837	0.0372018
N-Acetyl-DL-methionine	f_Burkholderiaceae	0.604255	0.037434
Harmane	o_Acidobacteriales	0.604187	0.0374611
myo-Inositol	f_Muribaculaceae	0.604075	0.037506
N-Acetyl-DL-methionine	f_Solirubrobacteraceae	0.603962	0.0375513
N-Acetyl-DL-methionine	o_Betaproteobacteriales	0.603954	0.0375545
Galactonic_acid	s_Bacillus_lehensis	0.603874	0.0375864
myo-Inositol	s_Brevibacillus_sp.	0.60364	0.0376806
Ala-Glu	g_Laceyella	0.603504	0.0377352
L-Glutamate	g_Alistipes	0.603466	0.0377505
Acetylcholine	o_Caulobacterales	0.603459	0.0377531
D-Threitol	f_Solirubrobacteraceae	0.603143	0.0378804
L-Gulonic_gamma-lactone	s_Bacillus_clausii	0.602919	0.0379709
L-Saccharopine	s_Paenibacillus_ginsengihumi	0.602778	0.038028
Acetylcholine	f_Caulobacteraceae	0.602447	0.0381619
Uracil	g_Bacillus	0.602339	0.0382057
Ile-Glu	s_Thermoactinomyces_intermedius	0.602201	0.0382615
Acetylcholine	s_Sphingobacterium_faecium	0.601874	0.0383944
Thr-Leu	f_Muribaculaceae	0.601688	0.0384704
Val-Ile	c_Actinobacteria	0.60145	0.0385673
Phytosphingosine	o_Caulobacterales	0.601216	0.0386631
Uracil	s_Paenibacillus_barengoltzii	0.601015	0.0387455
Ile-Phe	g_Thermoactinomyces	0.600767	0.0388471
Leu-Ser	g_Clostridium-sensu-stricto-13	0.600714	0.0388691
Val-Ile	g_Clostridium-sensu-stricto-13	0.600581	0.0389237
Uracil	f_Bacillaceae	0.600278	0.0390484
Ile-Ile	g_Micromonospora	0.600237	0.0390652
Isocitrate	g_Tuberibacillus	-0.60028	0.0390473
L-Alanine	s_Bacillus_shackletonii	-0.600436	0.0389833
L-Aspartate	g_Prevotellaceae-UCG-004	-0.600465	0.0389712
Ile-Phe	c_Thermoleophilia	-0.600538	0.0389411
3-(3-Hydroxyphenyl)propanoic_acid	s_Wallaby_gut	-0.600557	0.0389334
3-(3-Hydroxyphenyl)propanoic_acid	s_Bacillus_ginsengihumi	-0.600757	0.0388513
Phytosphingosine	g_Ureibacillus	-0.601388	0.038593
Thymine	g_Polyangium	-0.601866	0.038398
Dulcitol	s_Thermoactinomyces_daqus	-0.601915	0.0383779
Thr-Leu	g_Ideonella	-0.601939	0.0383683
L-Threonine	p_Actinobacteria	-0.602004	0.0383417
His-Ile	s_Asticcacaulis_sp.	-0.602081	0.0383102
Tyramine	c_Thermoleophilia	-0.60224	0.038246
D-Threitol	f_Clostridiaceae-1	-0.602844	0.038001
Ile-Val	o_Solirubrobacterales	-0.603056	0.0379155
myo-Inositol	g_Methylobacterium	-0.603225	0.0378475
5-Methylcytosine	g_Muribaculaceae	-0.603229	0.0378457
Thr-Glu	g_Zoogloea	-0.603291	0.0378209
Ile-Phe	g_Inhella	-0.603302	0.0378165
L-Saccharopine	g_Methylobacterium	-0.603876	0.0375858
Thymine	s_Bacillus_shackletonii	-0.604044	0.0375182
L-Malic_acid	g_Caulobacter	-0.604224	0.0374463
Thr-Val	s_Zoogloea_resiniphila	-0.604434	0.0373625
L-Aspartate	s_Bacillus_shackletonii	-0.604437	0.0373611
L-Aspartate	s_Brevibacillus_thermoruber	-0.604471	0.0373476
Thr-Phe	f_Leuconostocaceae	-0.604591	0.0372998
Ile-Glu	o_Rhizobiales	-0.604942	0.0371602
N-Acetyl-DL-methionine	g_Microbacterium	-0.605103	0.037096
Thr-Asp	g_Zoogloea	-0.605155	0.0370753
Phe-Pro	g_Pajaroellobacter	-0.605354	0.0369964
Malonic_acid	s_Brevibacillus_thermoruber	-0.605566	0.0369124
Ile-Ile	s_Asticcacaulis_sp.	-0.605653	0.036878
L-Glutamate	g_Seinonella	-0.605864	0.0367944
L-Aspartate	g_Clostridium-sensu-stricto-8	-0.605931	0.0367682
Ile-Glu	o_Acidobacteriales	-0.606066	0.0367149
Thr-Phe	g_Weissella	-0.606359	0.0365994
Ile-Phe	s_Zoogloea_resiniphila	-0.606477	0.0365529
L-Aspartate	g_Microbacterium	-0.60664	0.0364889
Norethindrone_Acetate	s_Weissella_paramesenteroides	-0.606646	0.0364867
D-Threitol	g_Clostridium-sensu-stricto-8	-0.606888	0.0363916
5-Methylcytosine	g_Thermoactinomyces	-0.607886	0.0360021
D-Threitol	g_Seinonella	-0.60789	0.0360005
L-Alanine	s_Wallaby_gut	-0.608005	0.0359559
Cytosine	s_Ambystoma_mexicanum	-0.608067	0.0359318
Harmane	f_Family-XVIII	-0.608092	0.0359223
L-Saccharopine	g_Zoogloea	-0.608501	0.0357637
5-Methylcytosine	s_Bacillus_shackletonii	-0.609074	0.0355424
L-Glutamate	s_Klebsiella_pneumoniae	-0.609214	0.0354883
L-Malic_acid	o_Flavobacteriales	-0.609259	0.0354713
L-Alanine	g_Prevotellaceae-UCG-004	-0.609278	0.0354639
Thr-Asp	c_Alphaproteobacteria	-0.609393	0.0354197
His-Ile	f_Caulobacteraceae	-0.609806	0.0352612
D-Lyxose	s_Ambystoma_mexicanum	-0.609845	0.0352461
Thymine	f_Micromonosporaceae	-0.610002	0.035186
Thymine	o_Micromonosporales	-0.610002	0.035186
Pro-Glu	f_Stappiaceae	-0.610605	0.0349561
His-Ile	s_Zoogloea_resiniphila	-0.610694	0.0349221
L-Saccharopine	f_Caulobacteraceae	-0.610821	0.0348737
His-Ile	o_Caulobacterales	-0.610883	0.0348504
Malonic_acid	g_Polyangium	-0.611029	0.034795
5-Methylcytosine	s_Thermoactinomyces_daqus	-0.611671	0.0345518
L-Saccharopine	o_Caulobacterales	-0.611911	0.0344615
Harmane	s_Brevibacillus_sp.	-0.611995	0.0344298
Thymine	g_Coprococcus_3	-0.612505	0.034238
Leu-Ser	c_Alphaproteobacteria	-0.612821	0.0341197
L-Alanine	g_Seinonella	-0.613153	0.0339955
Leu-Ser	f_Flavobacteriaceae	-0.613249	0.0339595
Dulcitol	g_Tuberibacillus	-0.613312	0.0339363
D-Threitol	g_Microbacterium	-0.613376	0.0339125
L-Threonine	c_Actinobacteria	-0.613735	0.0337788
Ile-Val	c_Alphaproteobacteria	-0.615124	0.0332655
5-Methylcytosine	g_Ureibacillus	-0.615518	0.033121
Ile-Pro	g_Zoogloea	-0.61554	0.0331129
Phytosphingosine	g_Tuberibacillus	-0.615756	0.0330337
Galactonic_acid	s_Weissella_paramesenteroides	-0.61576	0.0330323
Ala-Glu	o_Flavobacteriales	-0.615933	0.0329691
L-Aspartate	s_Bacillus_lehensis	-0.616023	0.0329363
Phytosphingosine	g_Brevibacillus	-0.616127	0.0328985
Ile-Glu	c_Alphaproteobacteria	-0.616266	0.0328479
Harmane	f_Micromonosporaceae	-0.616384	0.0328047
Harmane	o_Micromonosporales	-0.616384	0.0328047
Ile-Phe	c_Alphaproteobacteria	-0.617424	0.032428
L-Malic_acid	g_Zoogloea	-0.617562	0.0323784
Phytosphingosine	g_Prevotellaceae-UCG-004	-0.617582	0.032371
Val-Ile	f_Stappiaceae	-0.617584	0.0323704
Ile-Glu	o_Flavobacteriales	-0.617718	0.0323221
Thr-Leu	o_Lactobacillales	-0.617724	0.03232
Ile-Ile	g_Inhella	-0.618	0.0322208
Pro-Glu	o_Solirubrobacterales	-0.618025	0.0322118
Ile-Phe	g_Ideonella	-0.618081	0.0321916
Isocitrate	s_Paenibacillus_barengoltzii	-0.618109	0.0321814
L-Malic_acid	f_Caulobacteraceae	-0.618741	0.0319555
Thr-Val	g_Pannonibacter	-0.618882	0.0319049
Ile-Val	g_Pannonibacter	-0.619198	0.0317927
L-Alanine	g_Campylobacter	-0.619229	0.0317816
L-Alanine	f_Campylobacteraceae	-0.619229	0.0317816
Dulcitol	g_Coprococcus_3	-0.619715	0.0316091
3-(3-Hydroxyphenyl)propanoic_acid	s_Thermoactinomyces_daqus	-0.619729	0.0316041
L-Malic_acid	o_Caulobacterales	-0.619776	0.0315874
Ile-Ile	g_Pannonibacter	-0.620267	0.0314139
Ile-Ala	g_Zoogloea	-0.620392	0.0313699
Pro-Glu	o_Acidobacteriales	-0.62042	0.0313601
Diacetyl	s_Brevibacillus_thermoruber	-0.620537	0.0313189
Thymine	s_Klebsiella_pneumoniae	-0.620551	0.0313137
Tyramine	g_Alistipes	-0.620732	0.0312501
Dulcitol	f_Micromonosporaceae	-0.621327	0.0310416
Dulcitol	o_Micromonosporales	-0.621327	0.0310416
Malonic_acid	f_Paludibacteraceae	-0.621545	0.0309654
myo-Inositol	c_Alphaproteobacteria	-0.621807	0.0308743
myo-Inositol	s_Asticcacaulis_sp.	-0.621815	0.0308713
L-Gulonic_gamma-lactone	g_Aquabacterium	-0.621904	0.0308403
Thr-Glu	c_Thermoleophilia	-0.622098	0.0307728
5-Methylcytosine	f_Thermoactinomycetaceae	-0.622122	0.0307644
Malonic_acid	g_Microbacterium	-0.622698	0.0305651
L-Glutamate	s_Brevibacillus_thermoruber	-0.623195	0.0303935
L-Gulonic_gamma-lactone	c_Gammaproteobacteria	-0.623374	0.0303318
Ile-Val	o_Flavobacteriales	-0.623713	0.0302153
Isocitrate	s_Bacillus_circulans	-0.623939	0.0301379
L-Aspartate	f_Family-XVIII	-0.624525	0.0299379
L-Malic_acid	g_Alistipes	-0.624551	0.0299291
Cytosine	f_Clostridiaceae-1	-0.62474	0.0298646
Ile-Ala	g_Novosphingobium	-0.625135	0.0297305
3-(3-Hydroxyphenyl)propanoic_acid	c_Bacilli	-0.625358	0.0296551
Isocitrate	g_Thermobacillus	-0.625592	0.029576
D-Threitol	g_Campylobacter	-0.625687	0.029544
D-Threitol	f_Campylobacteraceae	-0.625687	0.029544
Ala-Lys	p_Proteobacteria	-0.625988	0.0294426
N-Acetyl-DL-methionine	s_Klebsiella_pneumoniae	-0.6261	0.0294049
Ile-Ile	o_Acidobacteriales	-0.626252	0.0293539
myo-Inositol	f_Bacteriovoracaceae	-0.62633	0.0293275
myo-Inositol	g_Peredibacter	-0.62633	0.0293275
Ala-Glu	g_Zoogloea	-0.626527	0.0292614
L-Alanine	f_Clostridiaceae-1	-0.626618	0.0292311
Ile-Ile	o_Solirubrobacterales	-0.627177	0.0290442
myo-Inositol	g_Alistipes	-0.62723	0.0290266
Thr-Glu	g_Methylobacterium	-0.627303	0.0290021
Ile-Ala	s_Novosphingobium_capsulatum	-0.627306	0.0290011
Thr-Asp	o_Solirubrobacterales	-0.627342	0.0289892
Thr-Asp	f_Flavobacteriaceae	-0.627366	0.0289813
Phytosphingosine	g_Geobacillus	-0.627514	0.028932
Isocitrate	c_Bacilli	-0.627565	0.0289151
Thr-Asp	g_Methylobacterium	-0.627611	0.0288997
D-Threitol	g_Prevotellaceae-UCG-004	-0.627684	0.0288757
L-Alanine	g_Clostridium-sensu-stricto-8	-0.627718	0.0288642
Ile-Ala	o_Sphingomonadales	-0.627732	0.0288595
Ile-Ala	f_Sphingomonadaceae	-0.627732	0.0288595
N-Acetyl-DL-methionine	p_Actinobacteria	-0.627787	0.0288413
L-Alanine	g_Microbacterium	-0.627956	0.0287856
His-Ile	o_Solirubrobacterales	-0.628071	0.0287472
Diacetyl	g_Clostridium-sensu-stricto-8	-0.628107	0.0287354
Malonic_acid	s_Thermoactinomyces_daqus	-0.628118	0.0287318
Thr-Glu	s_Zoogloea_resiniphila	-0.628369	0.028649
Thr-Val	c_Alphaproteobacteria	-0.628514	0.0286012
Val-Ile	o_Rhizobiales	-0.628825	0.0284986
D-Lyxose	s_Bacillus_coagulans	-0.629312	0.0283388
Pro-Glu	c_Alphaproteobacteria	-0.629417	0.0283046
Thr-Asp	s_Zoogloea_resiniphila	-0.629428	0.0283009
Phe-Pro	g_Flavobacterium	-0.62946	0.0282906
L-Gulonic_gamma-lactone	f_Flavobacteriaceae	-0.629469	0.0282874
Ile-Ile	o_Rhizobiales	-0.629689	0.0282156
L-Glutamate	g_Campylobacter	-0.629695	0.0282138
L-Glutamate	f_Campylobacteraceae	-0.629695	0.0282138
Tyramine	s_Alistipes_finegoldii	-0.630151	0.028065
Tyr-Val	o_Rhizobiales	-0.630265	0.0280281
Thr-Phe	g_Ideonella	-0.630345	0.028002
Thr-Leu	g_Alistipes	-0.630887	0.0278265
His-Ile	c_Thermoleophilia	-0.630893	0.0278245
Tyr-Val	g_Inhella	-0.630991	0.027793
Thr-Asp	g_Ideonella	-0.631083	0.0277632
N-Acetyl-DL-methionine	g_Thermoactinomyces	-0.631387	0.0276654
Cytosine	g_Geobacillus	-0.63147	0.0276387
Diacetyl	f_Micromonosporaceae	-0.631499	0.0276291
Diacetyl	o_Micromonosporales	-0.631499	0.0276291
Acetylcholine	s_Brevibacillus_thermoruber	-0.63152	0.0276226
Ile-Glu	g_Ideonella	-0.63163	0.0275872
Ile-Glu	g_Zoogloea	-0.631874	0.0275088
Cytosine	s_Bacillus_shackletonii	-0.631895	0.027502
L-Aspartate	s_Klebsiella_pneumoniae	-0.631955	0.027483
Harmane	g_Clostridium-sensu-stricto-8	-0.632049	0.0274526
Ile-Val	g_Zoogloea	-0.632277	0.0273799
Val-Ile	g_Ideonella	-0.632282	0.0273782
L-Threonine	g_Bacillus	-0.632293	0.0273747
Acetylcholine	g_Clostridium-sensu-stricto-13	-0.632398	0.0273411
Tyramine	f_Paracaedibacteraceae	-0.632936	0.0271699
Tyramine	o_Paracaedibacterales	-0.632936	0.0271699
L-Saccharopine	s_Zoogloea_resiniphila	-0.633151	0.0271017
Ile-Pro	g_Leuconostoc	-0.633181	0.0270923
Thr-Val	g_Leuconostoc	-0.633298	0.0270552
Thr-Glu	c_Alphaproteobacteria	-0.633388	0.0270267
Tyr-Val	g_Alistipes	-0.633669	0.0269377
L-Alanine	f_Family-XVIII	-0.633817	0.0268913
Thr-Glu	f_Flavobacteriaceae	-0.634305	0.0267376
Thr-Val	f_Stappiaceae	-0.634563	0.0266568
L-Threonine	f_Bacillaceae	-0.634919	0.0265454
Ile-Val	f_Stappiaceae	-0.635076	0.0264963
Acetylcholine	g_Clostridium-sensu-stricto-8	-0.635547	0.0263496
N-Acetyl-DL-methionine	s_Geobacillus_thermodenitrificans	-0.635962	0.0262211
L-Alanine	f_Micromonosporaceae	-0.636031	0.0261996
L-Alanine	o_Micromonosporales	-0.636031	0.0261996
Acetylcholine	f_Micromonosporaceae	-0.636494	0.0260566
Acetylcholine	o_Micromonosporales	-0.636494	0.0260566
Ile-Ala	s_Zoogloea_resiniphila	-0.636557	0.0260373
D-Threitol	s_Klebsiella_pneumoniae	-0.63659	0.0260272
Phe-Pro	g_Alistipes	-0.636787	0.0259664
Pro-Glu	f_Flavobacteriaceae	-0.637055	0.0258844
Norethindrone_Acetate	g_Weissella	-0.637318	0.0258037
Phe-Pro	s_Alistipes_finegoldii	-0.637446	0.0257645
Pro-Glu	g_Ideonella	-0.63746	0.0257602
L-Malic_acid	s_Alistipes_finegoldii	-0.637484	0.0257528
5-Methylcytosine	g_Polyangium	-0.637707	0.0256848
Harmane	g_Tuberibacillus	-0.637988	0.0255993
Norethindrone_Acetate	f_Leuconostocaceae	-0.638303	0.0255035
L-Alanine	s_Brevibacillus_thermoruber	-0.638486	0.0254481
Thr-Asp	g_Pannonibacter	-0.638493	0.0254459
myo-Inositol	g_Pannonibacter	-0.638646	0.0253995
D-Threitol	s_Brevibacillus_thermoruber	-0.638818	0.0253476
Harmane	c_Sericytochromatia	-0.638848	0.0253386
Harmane	f_Sericytochromatia	-0.638848	0.0253386
Harmane	o_Sericytochromatia	-0.638848	0.0253386
Harmane	g_Sericytochromatia	-0.638848	0.0253386
3-(3-Hydroxyphenyl)propanoic_acid	g_Lysinibacillus	-0.638903	0.0253219
Galactonic_acid	g_Weissella	-0.639022	0.025286
myo-Inositol	g_Leuconostoc	-0.639139	0.0252508
Ile-Ile	f_Stappiaceae	-0.639469	0.0251516
Malonic_acid	g_Prevotellaceae-UCG-001	-0.639795	0.0250537
D-Threitol	f_Micromonosporaceae	-0.640035	0.0249818
D-Threitol	o_Micromonosporales	-0.640035	0.0249818
Acetylcholine	s_Bacillus_circulans	-0.640092	0.024965
Val-Ile	o_Solirubrobacterales	-0.640147	0.0249485
L-Glutamate	f_Muribaculaceae	-0.640479	0.0248493
Galactonic_acid	o_Lactobacillales	-0.640515	0.0248387
L-Glutamate	s_Bacillus_lehensis	-0.640553	0.0248273
N-Acetyl-DL-methionine	f_Thermoactinomycetaceae	-0.640587	0.0248172
Ile-Pro	s_Zoogloea_resiniphila	-0.640605	0.0248119
3-(3-Hydroxyphenyl)propanoic_acid	g_Laceyella	-0.64072	0.0247777
3-(3-Hydroxyphenyl)propanoic_acid	g_Brevibacillus	-0.64079	0.0247569
Diacetyl	g_Clostridium-sensu-stricto-13	-0.640798	0.0247547
Thr-Glu	g_Inhella	-0.641496	0.024548
Malonic_acid	s_Bacillus_shackletonii	-0.641666	0.0244977
Ala-Glu	c_Thermoleophilia	-0.641729	0.0244793
L-Malic_acid	s_Zoogloea_resiniphila	-0.642016	0.0243949
Tyr-Val	c_Alphaproteobacteria	-0.642141	0.024358
N-Acetyl-DL-methionine	c_Actinobacteria	-0.642152	0.0243549
Diacetyl	s_Bacillus_shackletonii	-0.6423	0.0243114
Ile-Val	g_Ideonella	-0.642468	0.0242623
L-Saccharopine	f_Flavobacteriaceae	-0.642625	0.0242162
Thymine	f_Paludibacteraceae	-0.642686	0.0241987
Diacetyl	g_Tuberibacillus	-0.642757	0.0241777
N-Acetyl-DL-methionine	g_Geobacillus	-0.642898	0.0241365
Diacetyl	g_Microbacterium	-0.643087	0.0240816
D-Threitol	s_Bacillus_circulans	-0.643184	0.0240535
Ile-Pro	g_Alistipes	-0.643348	0.0240058
5-Methylcytosine	f_Clostridiaceae-1	-0.643363	0.0240014
L-Alanine	f_Heliobacteriaceae	-0.643592	0.0239348
Leu-Ser	p_Proteobacteria	-0.6437	0.0239035
His-Ile	c_Alphaproteobacteria	-0.644041	0.0238051
Thr-Asp	g_Alistipes	-0.644143	0.0237757
myo-Inositol	g_Caulobacter	-0.644288	0.023734
Acetylcholine	s_Bacillus_shackletonii	-0.64436	0.023713
Acetylcholine	g_Tuberibacillus	-0.644916	0.0235536
L-Glutamate	g_Muribaculaceae	-0.644949	0.0235441
Phytosphingosine	g_Polyangium	-0.644954	0.0235426
L-Threonine	g_Paenibacillus	-0.645002	0.0235288
5-Methylcytosine	f_Sporolactobacillaceae	-0.64512	0.023495
Ile-Ile	g_Zoogloea	-0.645132	0.0234917
Harmane	g_Thermoactinomyces	-0.645202	0.0234718
Dulcitol	c_Sericytochromatia	-0.645277	0.0234501
Dulcitol	f_Sericytochromatia	-0.645277	0.0234501
Dulcitol	o_Sericytochromatia	-0.645277	0.0234501
Dulcitol	g_Sericytochromatia	-0.645277	0.0234501
myo-Inositol	s_Alistipes_finegoldii	-0.645372	0.023423
Galactonic_acid	f_Leuconostocaceae	-0.645479	0.0233927
5-Methylcytosine	g_Lihuaxuella	-0.645529	0.0233782
D-Threitol	s_Bacillus_lehensis	-0.64607	0.0232248
Cytosine	p_Actinobacteria	-0.646221	0.0231819
D-Threitol	f_Family-XVIII	-0.646237	0.0231773
5-Methylcytosine	g_Brevibacillus	-0.646237	0.0231772
Thr-Glu	o_Solirubrobacterales	-0.646522	0.0230968
Pro-Glu	g_Zoogloea	-0.646837	0.0230078
Thr-Asp	o_Rhizobiales	-0.647024	0.0229554
Phytosphingosine	f_Sporolactobacillaceae	-0.647522	0.0228156
Cytosine	s_Geobacillus_thermodenitrificans	-0.648051	0.0226678
Ile-Phe	p_Proteobacteria	-0.648087	0.0226579
His-Ile	o_Rhizobiales	-0.648337	0.0225883
Ile-Phe	o_Solirubrobacterales	-0.648345	0.0225862
Val-Glu	s_Weissella_paramesenteroides	-0.648543	0.022531
Acetylcholine	g_Microbacterium	-0.648701	0.0224875
Val-Ile	c_Alphaproteobacteria	-0.649283	0.0223267
Harmane	s_Brevibacillus_thermoruber	-0.649453	0.0222798
L-Glutamate	g_Prevotellaceae-UCG-004	-0.649488	0.0222703
Ala-Glu	c_Alphaproteobacteria	-0.649553	0.0222522
Ile-Ala	g_Alistipes	-0.650038	0.0221194
myo-Inositol	o_Solirubrobacterales	-0.650189	0.022078
Tyr-Val	s_Alistipes_finegoldii	-0.65099	0.0218599
Isocitrate	f_Sporolactobacillaceae	-0.651041	0.0218461
Malonic_acid	s_Klebsiella_pneumoniae	-0.651367	0.0217579
myo-Inositol	f_Stappiaceae	-0.651474	0.021729
L-Saccharopine	c_Thermoleophilia	-0.651636	0.0216853
Thr-Leu	s_Alistipes_finegoldii	-0.651709	0.0216655
Leu-Ser	g_Methylobacterium	-0.651803	0.0216402
L-Saccharopine	g_Alistipes	-0.652028	0.0215796
Val-Ile	g_Alistipes	-0.65204	0.0215764
Phytosphingosine	s_Geobacillus_thermodenitrificans	-0.652074	0.0215674
Ile-Pro	s_Alistipes_finegoldii	-0.652163	0.0215435
L-Threonine	f_Paenibacillaceae	-0.652203	0.0215328
N-Acetyl-DL-methionine	p_Firmicutes	-0.652328	0.0214991
L-Saccharopine	c_Alphaproteobacteria	-0.652698	0.0214003
myo-Inositol	g_Asticcacaulis	-0.652782	0.0213778
Val-Ile	c_Gammaproteobacteria	-0.65281	0.0213702
Harmane	s_Bacillus_shackletonii	-0.652853	0.0213588
Dulcitol	g_Ureibacillus	-0.652925	0.0213396
Ala-Glu	s_Zoogloea_resiniphila	-0.653001	0.0213193
Val-Ile	o_Betaproteobacteriales	-0.65301	0.0213169
L-Alanine	s_Klebsiella_pneumoniae	-0.653091	0.0212953
Val-Ile	f_Burkholderiaceae	-0.653102	0.0212924
Thr-Glu	g_Alistipes	-0.653131	0.0212846
Ile-Ile	g_Methylobacterium	-0.653449	0.0212003
N-Acetyl-DL-methionine	g_Lihuaxuella	-0.653454	0.021199
Cytosine	s_Bacillus_ginsengihumi	-0.653856	0.0210926
Val-Ile	o_Acidobacteriales	-0.653941	0.0210699
Val-Glu	g_Alistipes	-0.654007	0.0210525
Norethindrone_Acetate	g_Aquabacterium	-0.654059	0.0210389
Diacetyl	g_Thermoactinomyces	-0.654103	0.0210273
Thymine	g_Clostridium-sensu-stricto-8	-0.654175	0.0210084
Ile-Ile	c_Alphaproteobacteria	-0.654323	0.0209694
L-Aspartate	g_Tuberibacillus	-0.654348	0.0209627
5-Methylcytosine	f_Heliobacteriaceae	-0.654413	0.0209456
Ala-Glu	g_Inhella	-0.654564	0.0209059
Val-Ile	g_Aquabacterium	-0.654611	0.0208935
Isocitrate	f_Paenibacillaceae	-0.654938	0.0208079
Ala-Lys	g_Azospirillum	-0.655208	0.0207372
Ile-Ala	s_Alistipes_finegoldii	-0.655337	0.0207037
L-Alanine	s_Bacillus_lehensis	-0.655418	0.0206827
Galactonic_acid	g_Leuconostoc	-0.655725	0.0206026
Dulcitol	g_Thermoactinomyces	-0.656053	0.0205176
Ala-Lys	o_Azospirillales	-0.656167	0.0204881
Ala-Lys	f_Azospirillaceae	-0.656167	0.0204881
Tyr-Val	g_Pannonibacter	-0.656172	0.0204867
Val-Glu	p_Proteobacteria	-0.656424	0.0204217
Tyr-Val	c_Thermoleophilia	-0.656531	0.0203942
Tyr-Val	g_Pajaroellobacter	-0.656563	0.0203858
Thr-Val	g_Ideonella	-0.656896	0.0203001
Phytosphingosine	g_Prevotellaceae-UCG-001	-0.657098	0.0202482
Ala-Glu	o_Rhizobiales	-0.657156	0.0202334
Thr-Glu	g_Pannonibacter	-0.657191	0.0202243
L-Threonine	s_Geobacillus_thermodenitrificans	-0.657206	0.0202204
His-Ile	g_Inhella	-0.657278	0.020202
Harmane	g_Microbacterium	-0.657666	0.0201029
Ile-Glu	s_Zoogloea_resiniphila	-0.657702	0.0200938
Thr-Leu	s_Novosphingobium_capsulatum	-0.657829	0.0200614
Ile-Pro	s_Weissella_paramesenteroides	-0.657936	0.020034
N-Acetyl-DL-methionine	c_Bacilli	-0.658913	0.0197864
3-(3-Hydroxyphenyl)propanoic_acid	s_Treponema_porcinum	-0.658959	0.0197748
Malonic_acid	s_Paenibacillus_ginsengihumi	-0.659117	0.0197349
L-Threonine	g_Clostridium-sensu-stricto-8	-0.659238	0.0197047
D-Threitol	f_Heliobacteriaceae	-0.659239	0.0197044
Ile-Ile	g_Ideonella	-0.659265	0.0196977
Thr-Asp	s_Alistipes_finegoldii	-0.659356	0.019675
Val-Ile	g_Zoogloea	-0.659425	0.0196576
Thr-Asp	f_Stappiaceae	-0.659639	0.0196039
Thr-Leu	g_Novosphingobium	-0.659708	0.0195866
Ile-Val	s_Zoogloea_resiniphila	-0.659725	0.0195824
L-Alanine	s_Bacillus_circulans	-0.660094	0.0194903
Ala-Glu	g_Pannonibacter	-0.660109	0.0194863
Ile-Glu	f_Flavobacteriaceae	-0.660194	0.0194651
myo-Inositol	s_Novosphingobium_capsulatum	-0.660277	0.0194445
Ile-Ala	g_Flavobacterium	-0.66042	0.0194088
Harmane	f_Thermoactinomycetaceae	-0.660667	0.0193477
Tyramine	o_Lactobacillales	-0.661097	0.0192411
Ala-Glu	f_Flavobacteriaceae	-0.661157	0.0192262
N-Acetyl-DL-methionine	s_Ambystoma_mexicanum	-0.661332	0.0191831
Cytosine	c_Actinobacteria	-0.661464	0.0191505
Thr-Leu	o_Sphingomonadales	-0.661627	0.0191104
Thr-Leu	f_Sphingomonadaceae	-0.661627	0.0191104
D-Lyxose	g_Bacillus	-0.66192	0.0190384
L-Glutamate	f_Family-XVIII	-0.661942	0.0190331
L-Aspartate	s_Thermoactinomyces_daqus	-0.662207	0.0189681
myo-Inositol	g_Novosphingobium	-0.662309	0.0189433
L-Malic_acid	f_Flavobacteriaceae	-0.662335	0.0189368
Leu-Ser	g_Alistipes	-0.662484	0.0189004
Dulcitol	g_Prevotellaceae-UCG-001	-0.662511	0.018894
Acetylcholine	g_Thermoactinomyces	-0.66309	0.018753
[truncated: 923 more rows]

## Sheet: CK vs GL
Table S9b Correlation analyses between differential bacteria and metabolites caused by glucose
Var1	Var2	Cor	P value
Isomaltose	s_Alistipes_finegoldii	0.864694	0.000591569
Isocitrate	c_Bacteroidia	0.847425	0.000989497
Isocitrate	p_Bacteroidetes	0.846888	0.00100443
L-Sorbose	f_Rikenellaceae	0.844247	0.00108045
Tyramine	f_Stappiaceae	0.837653	0.0012891
Malonic_acid	p_Bacteroidetes	0.83375	0.00142603
Malonic_acid	c_Bacteroidia	0.83354	0.00143367
Isomaltose	g_Alistipes	0.833096	0.00144998
Tyramine	g_Pannonibacter	0.825098	0.00176822
Isocitrate	g_Pelomonas	0.76779	0.00579271
Malonic_acid	s_Lactobacillus_reuteri	0.761988	0.00641441
L-Sorbose	s_Alistipes_finegoldii	0.7446	0.00857155
Isomaltose	o_Pseudomonadales	0.741589	0.00899287
Isomaltose	g_Acinetobacter	0.735008	0.009966
L-Sorbose	g_Alistipes	0.734269	0.0100798
Isomaltose	g_Moraxellaceae	0.730924	0.010607
L-Sorbose	g_Acinetobacter	0.718902	0.0126677
L-Sorbose	o_Pseudomonadales	0.715924	0.0132198
Tyramine	s_Lactobacillus_reuteri	0.713195	0.0137407
Malonic_acid	g_Pelomonas	0.709379	0.0144941
L-Sorbose	g_Moraxellaceae	0.707636	0.0148477
Tyramine	f_Rikenellaceae	0.694996	0.0176015
Tyramine	p_Bacteroidetes	0.690365	0.018696
Tyramine	c_Bacteroidia	0.69034	0.0187022
Malonic_acid	o_Pseudomonadales	0.689581	0.0188861
L-Sorbose	p_Bacteroidetes	0.687888	0.0193012
L-Sorbose	c_Bacteroidia	0.687546	0.0193858
Malonic_acid	g_Acinetobacter	0.678179	0.0218083
L-Sorbose	g_Escherichia-Shigella	0.678161	0.021813
Malonic_acid	g_Moraxellaceae	0.67804	0.0218456
Alpha-D-Glucose	s_Bacillus_smithii	0.676845	0.0221697
Isomaltose	f_Flavobacteriaceae	0.674879	0.0227105
Isomaltose	o_Flavobacteriales	0.666865	0.0250121
Isomaltose	s_Acinetobacter_gandensis	0.660451	0.0269692
Malonic_acid	f_Rikenellaceae	0.650016	0.0303805
Malonic_acid	f_Flavobacteriaceae	0.646666	0.031537
Malonic_acid	o_Flavobacteriales	0.636213	0.0353439
Isocitrate	s_Lactobacillus_reuteri	0.632712	0.0366879
L-Sorbose	f_Stappiaceae	0.63167	0.0370944
Isocitrate	f_Flavobacteriaceae	0.630612	0.0375105
Isocitrate	o_Flavobacteriales	0.629738	0.0378566
Isocitrate	o_Pseudomonadales	0.62913	0.0380987
L-Sorbose	g_Pannonibacter	0.62513	0.0397187
L-Sorbose	f_Flavobacteriaceae	0.624288	0.0400661
Isocitrate	g_Moraxellaceae	0.617787	0.0428162
Isocitrate	g_Acinetobacter	0.61375	0.0445883
Isomaltose	f_Rikenellaceae	0.608037	0.0471818
Malonic_acid	s_Alistipes_finegoldii	0.603992	0.0490793
Val-Arg	s_Alistipes_finegoldii	-0.604503	0.0488368
Leu-Ala	c_Bacteroidia	-0.605143	0.0485344
Leu-Ala	p_Bacteroidetes	-0.605255	0.0484816
Tyramine	s_Bacillus_smithii	-0.606813	0.0477505
Leu-Glu	c_Bacteroidia	-0.610365	0.0461127
Leu-Glu	p_Bacteroidetes	-0.610847	0.0458935
Isomaltose	s_Bacillus_smithii	-0.612819	0.0450041
Val-Arg	g_Alistipes	-0.61496	0.0440521
Malonic_acid	p_Actinobacteria	-0.62082	0.0415171
Alpha-D-Glucose	c_Bacteroidia	-0.624223	0.0400927
Alpha-D-Glucose	p_Bacteroidetes	-0.624761	0.0398709
N-Acetyl-L-phenylalanine	s_Alistipes_finegoldii	-0.625807	0.0394416
Leu-Ala	f_Rikenellaceae	-0.626649	0.0390982
Thr-Val	s_Lactobacillus_reuteri	-0.631388	0.0372049
Thr-Val	g_Escherichia-Shigella	-0.633155	0.0365158
Malonic_acid	c_Actinobacteria	-0.649965	0.030398
Norethindrone_Acetate	g_Pelomonas	-0.65626	0.0283051
N-Acetyl-L-phenylalanine	g_Alistipes	-0.656473	0.0282359
Thr-Val	c_Bacteroidia	-0.669223	0.0243184
Thr-Val	p_Bacteroidetes	-0.669476	0.0242449
Alpha-D-Glucose	s_Lactobacillus_reuteri	-0.674578	0.022794
Alpha-D-Glucose	g_Pannonibacter	-0.691119	0.0185145
Norethindrone_Acetate	g_Pannonibacter	-0.706301	0.0151228
L-Sorbose	c_Actinobacteria	-0.707858	0.0148024
Alpha-D-Glucose	f_Stappiaceae	-0.708509	0.0146699
L-Sorbose	p_Actinobacteria	-0.709257	0.0145187
N-Acetyl-L-phenylalanine	s_Lactobacillus_reuteri	-0.712215	0.0139314
N-Acetyl-L-phenylalanine	c_Bacteroidia	-0.715575	0.0132857
N-Acetyl-L-phenylalanine	p_Bacteroidetes	-0.716224	0.0131633
Norethindrone_Acetate	f_Stappiaceae	-0.721365	0.0122237
Malonic_acid	s_Bacillus_smithii	-0.726517	0.0113317
Alpha-D-Glucose	g_Escherichia-Shigella	-0.727747	0.0111259
Alpha-D-Glucose	g_Alistipes	-0.731003	0.0105943
Leu-Ala	g_Pannonibacter	-0.737522	0.00958566
Leu-Ala	f_Stappiaceae	-0.743999	0.00865456
Thr-Val	f_Rikenellaceae	-0.745177	0.0084925
Alpha-D-Glucose	s_Alistipes_finegoldii	-0.771146	0.00545393
N-Acetyl-L-phenylalanine	f_Rikenellaceae	-0.792831	0.00360433
Alpha-D-Glucose	f_Rikenellaceae	-0.835125	0.00137659

## Sheet: CK vs CE
Table S9c Correlation analyses between differential bacteria and metabolites caused by cellulase
Var1	Var2	Cor	P value
Thr-Val	s_Bacillus_smithii	0.908525	4.31892e-05
5-Methylcytosine	s_Bacillus_lehensis	0.879776	0.000161118
Scytalone	s_Bacillus_smithii	0.865283	0.00027751
Alpha-D-Glucose	s_Bacillus_smithii	0.782978	0.00259934
L-Gulonic_gamma-lactone	o_Campylobacterales	0.782396	0.00263161
L-Gulonic_gamma-lactone	p_Epsilonbacteraeota	0.782396	0.00263161
L-Gulonic_gamma-lactone	c_Campylobacteria	0.782396	0.00263161
D-Mannose	s_Bacillus_lehensis	0.779171	0.00281593
Uracil	s_Lactobacillus_brevis	0.777967	0.00288725
Ile-Glu	s_Lactobacillus_alimentarius	0.766707	0.00362235
Ile-Glu	o_Halanaerobiales	0.759758	0.00414195
Ile-Glu	g_Halanaerobium	0.759758	0.00414195
Ile-Glu	p_Halanaerobiaeota	0.759758	0.00414195
Ile-Glu	f_Halanaerobiaceae	0.759758	0.00414195
Ile-Glu	c_Halanaerobiia	0.759758	0.00414195
Myo-Inositol	s_Bacillus_smithii	0.750977	0.00487706
Ala-Lys	g_Aquabacterium	0.748945	0.00506033
His-Ile	s_Bacillus_smithii	0.74881	0.00507277
Ile-Phe	s_Bacillus_smithii	0.745084	0.00542293
Tyr-Val	o_Campylobacterales	0.744268	0.00550198
Tyr-Val	p_Epsilonbacteraeota	0.744268	0.00550198
Tyr-Val	c_Campylobacteria	0.744268	0.00550198
Scytalone	g_Intestinimonas	0.73831	0.00610599
L-Saccharopine	g_Intestinimonas	0.737321	0.00621083
D-Lyxose	g_Aquabacterium	0.734194	0.00655147
D-Lyxose	s_Bacillus_smithii	0.731873	0.00681313
Ala-Lys	s_Bacillus_smithii	0.728265	0.00723551
Tyramine	s_Spumella_like_flagellate	0.717788	0.00857343
Myo-Inositol	o_Campylobacterales	0.710046	0.00967494
Myo-Inositol	p_Epsilonbacteraeota	0.710046	0.00967494
Myo-Inositol	c_Campylobacteria	0.710046	0.00967494
2-Dehydro-3-deoxy-D-gluconate	s_Bacillus_smithii	0.706239	0.0102537
Thr-Val	g_Tuberibacillus	0.705498	0.0103693
Tyr-Val	s_Bacillus_smithii	0.696345	0.0118782
Thr-Val	g_Intestinimonas	0.693966	0.0122957
Ile-Val	o_Campylobacterales	0.676626	0.015675
Ile-Val	p_Epsilonbacteraeota	0.676626	0.015675
Ile-Val	c_Campylobacteria	0.676626	0.015675
Thr-Glu	s_Bacillus_lehensis	0.673416	0.0163684
D-Ribose	s_Bacillus_smithii	0.672557	0.0165579
Ala-Lys	g_Intestinimonas	0.668908	0.0173802
Ile-Val	s_Bacillus_smithii	0.661569	0.0191247
His-Ile	g_Aquabacterium	0.660537	0.0193798
Thr-Glu	o_Campylobacterales	0.657295	0.0201978
Thr-Glu	p_Epsilonbacteraeota	0.657295	0.0201978
Thr-Glu	c_Campylobacteria	0.657295	0.0201978
Maltitol	s_Bacillus_lehensis	0.657247	0.0202099
Myo-Inositol	g_Intestinimonas	0.656895	0.0203003
Ala-Glu	o_Campylobacterales	0.656751	0.0203373
Ala-Glu	p_Epsilonbacteraeota	0.656751	0.0203373
Ala-Glu	c_Campylobacteria	0.656751	0.0203373
2-Dehydro-3-deoxy-D-gluconate	g_Intestinimonas	0.655349	0.0207006
Ile-Ile	s_Bacillus_smithii	0.654075	0.0210348
Harmane	s_Lactobacillus_brevis	0.65355	0.0211735
His-Ile	g_Intestinimonas	0.652466	0.0214622
Tyramine	s_Lactobacillus_brevis	0.647498	0.0228223
Diosmetin	s_Bacillus_smithii	0.64655	0.0230887
Ala-Lys	o_Campylobacterales	0.646096	0.0232173
Ala-Lys	p_Epsilonbacteraeota	0.646096	0.0232173
Ala-Lys	c_Campylobacteria	0.646096	0.0232173
His-Ile	o_Campylobacterales	0.643278	0.0240261
His-Ile	p_Epsilonbacteraeota	0.643278	0.0240261
His-Ile	c_Campylobacteria	0.643278	0.0240261
Thr-Leu	o_Campylobacterales	0.640184	0.0249373
Thr-Leu	p_Epsilonbacteraeota	0.640184	0.0249373
Thr-Leu	c_Campylobacteria	0.640184	0.0249373
Harmane	s_Spumella_like_flagellate	0.637957	0.0256086
Ile-Phe	g_Aquabacterium	0.635137	0.0264774
2-Dehydro-3-deoxy-D-gluconate	g_Aquabacterium	0.631584	0.0276018
3-(3-Hydroxyphenyl)propanoic_acid	f_Sphingomonadaceae	0.630985	0.0277949
3-(3-Hydroxyphenyl)propanoic_acid	o_Sphingomonadales	0.630985	0.0277949
3-(3-Hydroxyphenyl)propanoic_acid	g_Novosphingobium	0.630741	0.0278738
Diosmetin	g_Intestinimonas	0.627015	0.0290981
L-Gulonic_gamma-lactone	g_Intestinimonas	0.626112	0.0294006
3-(3-Hydroxyphenyl)propanoic_acid	s_Novosphingobium_capsulatum	0.624822	0.0298367
Ile-Glu	s_Spumella_like_flagellate	0.624802	0.0298437
Ile-Pro	s_Bacillus_lehensis	0.614714	0.0334165
Ala-Glu	s_Bacillus_smithii	0.614138	0.0336294
Alpha-D-Glucose	s_Bacillus_lehensis	0.613789	0.0337586
Ile-Ile	o_Campylobacterales	0.613673	0.0338016
Ile-Ile	p_Epsilonbacteraeota	0.613673	0.0338016
Ile-Ile	c_Campylobacteria	0.613673	0.0338016
Tyr-Val	g_Aquabacterium	0.607434	0.0361782
2-Dehydro-3-deoxy-D-gluconate	g_Tuberibacillus	0.605037	0.0371224
Leu-Ser	s_Novosphingobium_capsulatum	-0.600789	0.038838
alpha-Linolenic_acid	s_Lactobacillus_brevis	-0.600819	0.0388259
Leu-Ser	f_Sphingomonadaceae	-0.600872	0.0388042
Leu-Ser	o_Sphingomonadales	-0.600872	0.0388042
Leu-Ser	g_Novosphingobium	-0.600902	0.0387917
Ile-Phe	s_Spumella_like_flagellate	-0.602469	0.0381528
L-Alanine	s_Bacillus_lehensis	-0.605541	0.0369225
Acetylcholine	s_Bacillus_lehensis	-0.607836	0.0360217
Scytalone	s_Spumella_like_flagellate	-0.613229	0.033967
Alpha-D-Glucose	s_Lactobacillus_brevis	-0.622986	0.0304654
3-(3-Hydroxyphenyl)propanoic_acid	s_Bacillus_lehensis	-0.623807	0.0301831
Tyramine	g_Intestinimonas	-0.631379	0.027668
Thr-Val	s_Lactobacillus_brevis	-0.633536	0.02698
Ile-Val	s_Lactobacillus_brevis	-0.636564	0.0260351
Tyr-Val	s_Lactobacillus_brevis	-0.641337	0.0245948
N-Acetyl-DL-methionine	s_Spumella_like_flagellate	-0.641939	0.0244175
Phytosphingosine	s_Lactobacillus_brevis	-0.643217	0.0240438
His-Ile	s_Spumella_like_flagellate	-0.647487	0.0228256
Ala-Lys	s_Spumella_like_flagellate	-0.648408	0.0225685
L-Aspartate	s_Bacillus_smithii	-0.649285	0.0223261
Ile-Ala	s_Lactobacillus_brevis	-0.649702	0.0222114
Harmane	g_Aquabacterium	-0.650324	0.0220413
Tyr-Val	s_Spumella_like_flagellate	-0.65241	0.0214772
D-Lyxose	s_Spumella_like_flagellate	-0.653462	0.0211968
Harmane	s_Bacillus_lehensis	-0.653616	0.0211559
Acetylcholine	g_Tuberibacillus	-0.657216	0.0202181
2-Dehydro-3-deoxy-D-gluconate	s_Spumella_like_flagellate	-0.657748	0.0200819
Scytalone	s_Lactobacillus_brevis	-0.662527	0.01889
Myo-Inositol	s_Spumella_like_flagellate	-0.663844	0.0185708
Diacetyl	s_Bacillus_lehensis	-0.672217	0.0166334
Harmane	o_Campylobacterales	-0.676012	0.0158059
Harmane	p_Epsilonbacteraeota	-0.676012	0.0158059
Harmane	c_Campylobacteria	-0.676012	0.0158059
His-Ile	s_Lactobacillus_brevis	-0.683235	0.0143153
Tyramine	g_Aquabacterium	-0.685488	0.0138723
Val-Ile	s_Lactobacillus_brevis	-0.689414	0.0131247
Myo-Inositol	s_Lactobacillus_brevis	-0.689621	0.0130861
Ile-Phe	s_Lactobacillus_brevis	-0.706309	0.0102428
Diosmetin	s_Lactobacillus_brevis	-0.707118	0.0101178
Tyramine	o_Campylobacterales	-0.711758	0.00942284
Tyramine	p_Epsilonbacteraeota	-0.711758	0.00942284
Tyramine	c_Campylobacteria	-0.711758	0.00942284
Thr-Leu	s_Lactobacillus_brevis	-0.715917	0.00883067
Ala-Glu	s_Lactobacillus_brevis	-0.723083	0.00787603
Tyramine	s_Bacillus_smithii	-0.7327	0.00671908
Benzoic_acid	s_Spumella_like_flagellate	-0.741671	0.00575944
Ala-Lys	s_Lactobacillus_brevis	-0.752449	0.00474742
Thr-Glu	s_Lactobacillus_brevis	-0.7597	0.00414651
Pro-Glu	s_Lactobacillus_brevis	-0.774137	0.00312316
Ile-Ile	s_Lactobacillus_brevis	-0.795887	0.00195817

## Sheet: CK vs BS
Table S9d Correlation analyses between differential bacteria and metabolites caused by Bacillus subtilis
Var1	Var2	Cor	P value
His-Pro	s_Brevibacillus_thermoruber	0.893544	8.98336e-05
Isomaltose	s_Brevibacillus_thermoruber	0.885012	0.00013014
His-Pro	g_Brevibacillus	0.867571	0.000255755
Dopamine	g_Brevibacillus	0.862881	0.000301863
Isomaltose	s_Thermoactinomyces_daqus	0.860266	0.00033025
Isomaltose	g_Brevibacillus	0.859752	0.00033606
Thr-Arg	p_Planctomycetes	0.852426	0.000427941
Dopamine	f_Bacillaceae	0.845439	0.000532687
Isomaltose	g_Thermoactinomyces	0.845416	0.000533053
Dopamine	o_Bacillales	0.841503	0.000599859
Myo-Inositol	p_Planctomycetes	0.836099	0.00070256
Tyramine	s_Novosphingobium_capsulatum	0.834541	0.000734544
Tyramine	g_Novosphingobium	0.833152	0.000764024
Isomaltose	f_Thermoactinomycetaceae	0.83269	0.000774013
Dopamine	f_Paenibacillaceae	0.830108	0.000831782
Tyramine	o_Sphingomonadales	0.829226	0.000852261
Tyramine	f_Sphingomonadaceae	0.829226	0.000852261
Myo-Inositol	g_Brevibacillus	0.828842	0.000861293
Dopamine	g_Bacillus	0.824414	0.000970926
Myo-Inositol	s_Brevibacillus_thermoruber	0.823939	0.000983296
Thr-Arg	g_Brevibacillus	0.823217	0.00100233
His-Pro	g_Thermoactinomyces	0.822752	0.00101475
Val-Arg	p_Planctomycetes	0.813884	0.0012749
Dopamine	s_Brevibacillus_thermoruber	0.812064	0.00133412
Dopamine	g_Thermoactinomyces	0.800872	0.00174609
Dopamine	g_Thermobacillus	0.796276	0.00194096
Dopamine	f_Thermoactinomycetaceae	0.795959	0.00195497
Dopamine	p_Planctomycetes	0.791177	0.00217618
Arachidonic_Acid	g_Bacillus	0.790713	0.00219862
N-Acetyl-L-phenylalanine	f_Bacillaceae	0.788431	0.00231152
Thr-Arg	s_Brevibacillus_thermoruber	0.786981	0.00238556
Dopamine	s_Thermobacillus_composti	0.786841	0.00239281
N-Acetyl-L-phenylalanine	g_Bacillus	0.786826	0.0023936
Arachidonic_Acid	f_Bacillaceae	0.784126	0.00253662
His-Pro	f_Thermoactinomycetaceae	0.781181	0.00269998
Isomaltose	g_Thermobacillus	0.780345	0.00274777
Ala-Lys	f_Bacillaceae	0.774757	0.00308402
Ala-Lys	g_Bacillus	0.772641	0.00321916
Isomaltose	s_Thermobacillus_composti	0.771274	0.00330886
Dopamine	s_Thermoactinomyces_daqus	0.768831	0.00347388
D-Threitol	s_Thermoactinomyces_daqus	0.76127	0.00402433
N-Acetyl-L-phenylalanine	o_Bacillales	0.760732	0.00406588
Ala-Lys	o_Bacillales	0.759873	0.00413289
Arachidonic_Acid	o_Bacillales	0.75615	0.00443307
Ala-Lys	g_Brevibacillus	0.754064	0.00460821
Tyramine	c_Alphaproteobacteria	0.751414	0.0048383
Arachidonic_Acid	s_Brevibacillus_thermoruber	0.749922	0.00497156
Tyramine	g_Inhella	0.749334	0.00502486
His-Pro	s_Thermoactinomyces_daqus	0.74872	0.00508095
Arachidonic_Acid	g_Brevibacillus	0.747722	0.00517322
N-Acetyl-L-phenylalanine	g_Brevibacillus	0.743135	0.00561322
Tyramine	f_Stappiaceae	0.741896	0.00573683
Isomaltose	p_Planctomycetes	0.737688	0.00617183
N-Acetyl-DL-methionine	s_Brevibacillus_thermoruber	0.736689	0.00627858
His-Pro	p_Planctomycetes	0.734962	0.00646657
Isomaltose	f_Paenibacillaceae	0.732257	0.00676932
Tyramine	g_Pannonibacter	0.7301	0.00701834
N-Acetyl-L-phenylalanine	s_Brevibacillus_thermoruber	0.728758	0.00717663
Thr-Arg	g_Thermoactinomyces	0.727397	0.00733995
Arachidonic_Acid	g_Thermoactinomyces	0.727199	0.00736403
Isomaltose	o_Bacillales	0.726841	0.00740754
Arachidonic_Acid	g_Thermobacillus	0.726338	0.00746893
Ala-Lys	s_Brevibacillus_thermoruber	0.725543	0.00756691
His-Pro	f_Paenibacillaceae	0.724732	0.00766779
20-Hydroxyarachidonic_acid	f_Bacillaceae	0.724134	0.0077429
20-Hydroxyarachidonic_acid	s_Thermobacillus_composti	0.723817	0.00778279
Arachidonic_Acid	s_Thermobacillus_composti	0.723666	0.00780193
N-Acetyl-DL-methionine	g_Brevibacillus	0.722118	0.00799983
20-Hydroxyarachidonic_acid	g_Thermobacillus	0.721415	0.00809099
N-Acetyl-L-phenylalanine	g_Thermoactinomyces	0.72105	0.00813855
Ala-Lys	f_Paenibacillaceae	0.720999	0.00814524
Myo-Inositol	g_Thermoactinomyces	0.719747	0.00831033
Arachidonic_Acid	f_Thermoactinomycetaceae	0.718916	0.00842116
Thr-Arg	f_Paenibacillaceae	0.718168	0.0085219
His-Pro	g_Thermobacillus	0.716132	0.00880084
Ala-Lys	p_Planctomycetes	0.716077	0.00880836
N-Acetyl-L-phenylalanine	f_Thermoactinomycetaceae	0.71517	0.00893491
His-Pro	s_Thermobacillus_composti	0.714111	0.00908421
20-Hydroxyarachidonic_acid	g_Bacillus	0.714106	0.00908495
Isomaltose	g_Bacillus	0.712401	0.00932941
20-Hydroxyarachidonic_acid	s_Brevibacillus_thermoruber	0.711994	0.00938846
Isomaltose	f_Bacillaceae	0.709033	0.00982645
Arachidonic_Acid	s_Thermoactinomyces_daqus	0.707476	0.0100629
Ala-Lys	s_Thermoactinomyces_daqus	0.705916	0.010304
Ala-Lys	g_Thermoactinomyces	0.703633	0.0106644
20-Hydroxyarachidonic_acid	g_Thermoactinomyces	0.70299	0.0107677
Ala-Lys	f_Thermoactinomycetaceae	0.702539	0.0108405
N-Acetyl-L-phenylalanine	f_Paenibacillaceae	0.702489	0.0108485
Thr-Arg	f_Thermoactinomycetaceae	0.702466	0.0108523
20-Hydroxyarachidonic_acid	g_Brevibacillus	0.701293	0.0110436
Arachidonic_Acid	f_Paenibacillaceae	0.700663	0.0111474
Val-Arg	g_Brevibacillus	0.697609	0.0116606
Thr-Arg	f_Bacillaceae	0.697494	0.0116804
20-Hydroxyarachidonic_acid	o_Bacillales	0.694125	0.0122674
Thr-Arg	o_Bacillales	0.69406	0.0122789
N-Acetyl-L-phenylalanine	s_Thermoactinomyces_daqus	0.69225	0.0126034
N-Acetyl-L-phenylalanine	s_Thermobacillus_composti	0.690712	0.0128841
20-Hydroxyarachidonic_acid	f_Thermoactinomycetaceae	0.690463	0.01293
N-Acetyl-L-phenylalanine	g_Thermobacillus	0.688526	0.013291
20-Hydroxyarachidonic_acid	p_Planctomycetes	0.685114	0.013945
Myo-Inositol	f_Thermoactinomycetaceae	0.68505	0.0139575
Myo-Inositol	s_Thermoactinomyces_daqus	0.683946	0.0141744
Thr-Arg	s_Thermoactinomyces_daqus	0.679896	0.0149907
Ala-Lys	g_Thermobacillus	0.679886	0.0149928
Arachidonic_Acid	p_Planctomycetes	0.671396	0.0168163
Ala-Lys	s_Thermobacillus_composti	0.670456	0.0170279
Thr-Arg	g_Bacillus	0.669988	0.0171339
Myo-Inositol	f_Paenibacillaceae	0.669543	0.017235
Myo-Inositol	f_Bacillaceae	0.668391	0.0174992
Myo-Inositol	o_Bacillales	0.66612	0.0180286
Val-Arg	s_Brevibacillus_thermoruber	0.664336	0.0184526
His-Pro	o_Bacillales	0.663824	0.0185756
Thr-Arg	g_Thermobacillus	0.659159	0.0197245
Myo-Inositol	g_Bacillus	0.656789	0.0203275
Thr-Arg	s_Thermobacillus_composti	0.656047	0.0205193
20-Hydroxyarachidonic_acid	f_Paenibacillaceae	0.65266	0.0214103
20-Hydroxyarachidonic_acid	s_Thermoactinomyces_daqus	0.647412	0.0228465
3-(3-Hydroxyphenyl)propanoic_acid	o_Sphingomonadales	0.643902	0.0238452
3-(3-Hydroxyphenyl)propanoic_acid	f_Sphingomonadaceae	0.643902	0.0238452
His-Pro	f_Bacillaceae	0.643698	0.0239043
Isomaltose	p_Deinococcus-Thermus	0.643339	0.0240084
Isomaltose	c_Deinococci	0.643339	0.0240084
N-Acetyl-DL-methionine	p_Planctomycetes	0.641288	0.0246093
Hypoxanthine	p_Planctomycetes	0.637862	0.0256376
3-(3-Hydroxyphenyl)propanoic_acid	s_Novosphingobium_capsulatum	0.632608	0.0272743
Val-Arg	s_Thermoactinomyces_daqus	0.632005	0.0274668
Diosmetin	s_Thermoactinomyces_daqus	0.6315	0.027629
3-(3-Hydroxyphenyl)propanoic_acid	g_Novosphingobium	0.63132	0.0276867
Tyramine	s_Lactobacillus_reuteri	0.629988	0.0281182
Tyramine	o_Rhizobiales	0.629948	0.0281313
D-Threitol	s_Bacillus_smithii	0.629236	0.0283638
Phe-Pro	g_Bacillus	0.628374	0.0286471
D-Threitol	f_Thermoactinomycetaceae	0.623706	0.0302179
Diosmetin	s_Brevibacillus_thermoruber	0.619977	0.0315165
His-Pro	g_Bacillus	0.618658	0.0319851
Diosmetin	g_Thermoactinomyces	0.614971	0.0333219
Phe-Pro	s_Thermoactinomyces_daqus	0.60801	0.0359541
Isomaltose	s_Bacillus_smithii	0.607582	0.0361206
D-Threitol	g_Thermoactinomyces	0.604121	0.0374877
N-Acetyl-DL-methionine	g_Thermoactinomyces	0.60388	0.0375842
Val-Arg	g_Thermoactinomyces	0.603058	0.0379147
Ala-Lys	s_Paenibacillus_barengoltzii	0.602434	0.038167
Phe-Pro	f_Bacillaceae	0.600367	0.0390115
His-Pro	f_Flavobacteriaceae	-0.601882	0.0383915
Hypoxanthine	f_Caulobacteraceae	-0.604895	0.0371787
Hypoxanthine	o_Caulobacterales	-0.605328	0.0370065
N-Acetyl-DL-methionine	g_Pannonibacter	-0.605572	0.0369102
Diosmetin	f_Stappiaceae	-0.606656	0.0364829
N-Acetyl-DL-methionine	f_Stappiaceae	-0.606936	0.036373
3-(3-Hydroxyphenyl)propanoic_acid	s_Thermobacillus_composti	-0.609582	0.035347
Hypoxanthine	g_Pannonibacter	-0.610092	0.0351518
Hypoxanthine	f_Stappiaceae	-0.610934	0.0348308
Isomaltose	o_Rhizobiales	-0.61106	0.0347831
Hypoxanthine	g_Inhella	-0.612851	0.0341083
Diosmetin	o_Sphingomonadales	-0.614398	0.0335332
Diosmetin	f_Sphingomonadaceae	-0.614398	0.0335332
Myo-Inositol	f_Caulobacteraceae	-0.616372	0.0328092
Myo-Inositol	o_Caulobacterales	-0.617835	0.0322802
Diosmetin	g_Novosphingobium	-0.617837	0.0322794
Diosmetin	s_Novosphingobium_capsulatum	-0.618614	0.0320008
Arachidonic_Acid	o_Sphingomonadales	-0.618963	0.0318764
Arachidonic_Acid	f_Sphingomonadaceae	-0.618963	0.0318764
3-(3-Hydroxyphenyl)propanoic_acid	g_Thermobacillus	-0.61987	0.0315541
N-Acetyl-DL-methionine	f_Caulobacteraceae	-0.62029	0.0314056
N-Acetyl-DL-methionine	o_Caulobacterales	-0.62095	0.0311737
3-(3-Hydroxyphenyl)propanoic_acid	s_Bacillus_smithii	-0.622501	0.0306332
Arachidonic_Acid	s_Novosphingobium_capsulatum	-0.623785	0.0301907
Arachidonic_Acid	g_Novosphingobium	-0.624212	0.0300446
Myo-Inositol	g_Pannonibacter	-0.639236	0.0252216
20-Hydroxyarachidonic_acid	s_Lactobacillus_reuteri	-0.639711	0.0250788
Isomaltose	s_Lactobacillus_reuteri	-0.647165	0.0229158
Myo-Inositol	f_Stappiaceae	-0.647978	0.0226883
D-Threitol	g_Pannonibacter	-0.648785	0.0224642
Ala-Lys	g_Azospirillum	-0.651345	0.0217638
Ala-Lys	o_Azospirillales	-0.651882	0.0216191
Ala-Lys	f_Azospirillaceae	-0.651882	0.0216191
Ala-Lys	f_Stappiaceae	-0.652917	0.0213417
N-Acetyl-DL-methionine	g_Inhella	-0.653005	0.0213182
Ala-Lys	g_Pannonibacter	-0.654471	0.0209304
N-Acetyl-L-phenylalanine	c_Alphaproteobacteria	-0.654566	0.0209053
D-Threitol	f_Stappiaceae	-0.657828	0.0200615
Tyramine	p_Deinococcus-Thermus	-0.660083	0.019493
Tyramine	c_Deinococci	-0.660083	0.019493
3-(3-Hydroxyphenyl)propanoic_acid	o_Bacillales	-0.661339	0.0191814
Hypoxanthine	o_Rhizobiales	-0.662599	0.0188724
Dopamine	g_Inhella	-0.669213	0.0173105
Ala-Lys	g_Inhella	-0.674754	0.0160766
D-Threitol	g_Inhella	-0.676452	0.015712
Myo-Inositol	s_Lactobacillus_reuteri	-0.677868	0.0154124
Arachidonic_Acid	f_Paracaedibacteraceae	-0.67846	0.0152885
Arachidonic_Acid	o_Paracaedibacterales	-0.67846	0.0152885
Isomaltose	c_Alphaproteobacteria	-0.680238	0.0149205
20-Hydroxyarachidonic_acid	f_Moraxellaceae	-0.681655	0.014632
Dopamine	c_Alphaproteobacteria	-0.683875	0.0141883
20-Hydroxyarachidonic_acid	o_Pseudomonadales	-0.684159	0.0141324
3-(3-Hydroxyphenyl)propanoic_acid	f_Bacillaceae	-0.684957	0.0139757
20-Hydroxyarachidonic_acid	g_Acinetobacter	-0.685946	0.0137834
Arachidonic_Acid	f_Flavobacteriaceae	-0.690661	0.0128936
Arachidonic_Acid	o_Flavobacteriales	-0.691661	0.0127104
Arachidonic_Acid	s_Lactobacillus_reuteri	-0.695665	0.0119965
Myo-Inositol	g_Inhella	-0.698914	0.0114392
D-Threitol	o_Rhizobiales	-0.705634	0.010348
3-(3-Hydroxyphenyl)propanoic_acid	g_Bacillus	-0.71748	0.00861539
Isomaltose	g_Pannonibacter	-0.718909	0.00842211
Tyramine	s_Paenibacillus_barengoltzii	-0.720874	0.00816169
3-(3-Hydroxyphenyl)propanoic_acid	s_Paenibacillus_barengoltzii	-0.726438	0.00745674
Isomaltose	g_Inhella	-0.733468	0.00663252
Isomaltose	f_Stappiaceae	-0.734128	0.00655882
Arachidonic_Acid	f_Moraxellaceae	-0.741369	0.00579001
Arachidonic_Acid	g_Acinetobacter	-0.741722	0.00575436
Phe-Pro	s_Lactobacillus_reuteri	-0.742165	0.00570977
N-Acetyl-L-phenylalanine	o_Sphingomonadales	-0.744708	0.00545931
N-Acetyl-L-phenylalanine	f_Sphingomonadaceae	-0.744708	0.00545931
Arachidonic_Acid	o_Pseudomonadales	-0.746874	0.00525253
Ala-Lys	s_Lactobacillus_reuteri	-0.746996	0.00524104
N-Acetyl-L-phenylalanine	s_Novosphingobium_capsulatum	-0.750842	0.0048891
Dopamine	s_Lactobacillus_reuteri	-0.750861	0.00488741
N-Acetyl-L-phenylalanine	g_Novosphingobium	-0.751634	0.00481888
Dopamine	o_Sphingomonadales	-0.753523	0.00465453
Dopamine	f_Sphingomonadaceae	-0.753523	0.00465453
Dopamine	s_Novosphingobium_capsulatum	-0.757534	0.00431962
Dopamine	g_Novosphingobium	-0.76045	0.00408783
Isomaltose	o_Sphingomonadales	-0.768952	0.00346556
Isomaltose	f_Sphingomonadaceae	-0.768952	0.00346556
Isomaltose	s_Novosphingobium_capsulatum	-0.770521	0.0033591
Isomaltose	g_Novosphingobium	-0.772313	0.00324054
Tyramine	s_Bacillus_smithii	-0.772758	0.00321159
Tyramine	f_Bacillaceae	-0.777765	0.00289935
Tyramine	g_Bacillus	-0.782906	0.00260331
Ala-Lys	c_Alphaproteobacteria	-0.787442	0.00236185
Tyramine	f_Paenibacillaceae	-0.791777	0.00214739
Tyramine	o_Bacillales	-0.798082	0.00186249
N-Acetyl-L-phenylalanine	s_Lactobacillus_reuteri	-0.801192	0.00173307
Ala-Lys	s_Novosphingobium_capsulatum	-0.861639	0.000315103
Tyramine	g_Brevibacillus	-0.863218	0.000298356
Ala-Lys	g_Novosphingobium	-0.864564	0.000284628
Ala-Lys	o_Sphingomonadales	-0.865364	0.000276716
Ala-Lys	f_Sphingomonadaceae	-0.865364	0.000276716
Tyramine	s_Thermobacillus_composti	-0.883643	0.000137744
Tyramine	g_Thermobacillus	-0.891089	0.000100253
Tyramine	s_Brevibacillus_thermoruber	-0.900256	6.56287e-05
Tyramine	s_Thermoactinomyces_daqus	-0.922546	1.92558e-05
Tyramine	f_Thermoactinomycetaceae	-0.923151	1.85345e-05
Tyramine	g_Thermoactinomyces	-0.929721	1.19901e-05
